# Supplementary material for: Direct and indirect economic and health consequences of COPD in Denmark: a national register-based study: 1998–2010
Source: PubMed Central journal article supplement — BMJ Open. 2014 Jan 6;4(1):e004069. doi: 10.1136/bmjopen-2013-004069 (PMC3902350; doi:10.1136/bmjopen-2013-004069), 2014-01-06
Supplement: bmjopen-2013-004069.draft_revisions.pdf [file bmjopen-2013-004069.draft_revisions.pdf]

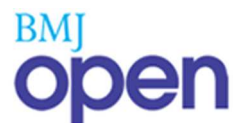

**Direct and indirect economic and health consequences of  
COPD in Denmark - 1998-2010**

|                                 |                                                                                                                                                                                                                                                                                                                                                                                                                                                                 |
|---------------------------------|-----------------------------------------------------------------------------------------------------------------------------------------------------------------------------------------------------------------------------------------------------------------------------------------------------------------------------------------------------------------------------------------------------------------------------------------------------------------|
| Journal:                        | <i>BMJ Open</i>                                                                                                                                                                                                                                                                                                                                                                                                                                                 |
| Manuscript ID:                  | bmjopen-2013-004069                                                                                                                                                                                                                                                                                                                                                                                                                                             |
| Article Type:                   | Research                                                                                                                                                                                                                                                                                                                                                                                                                                                        |
| Date Submitted by the Author:   | 19-Sep-2013                                                                                                                                                                                                                                                                                                                                                                                                                                                     |
| Complete List of Authors:       | Løkke, Anders; Aarhus University Hospital, Lung Department, B Hilberg, Ole; Aarhus University Hospital, Lung Department, B Tønnesen, Philip; Gentofte University Hospital, Lung Department Ibsen, Rikke; itracks, Kjellberg, Jakob; Danish Institute for Local and Regional Government Research, Jennum, Poul; Glostrup Hospital, Danish Center for Sleep Medicine, Department of Clinical Neurophysiology; University of Copenhagen, Center for Healthy Ageing |
| <b>Primary Subject Heading</b>: | Respiratory medicine                                                                                                                                                                                                                                                                                                                                                                                                                                            |
| Secondary Subject Heading:      | Epidemiology, Health economics                                                                                                                                                                                                                                                                                                                                                                                                                                  |
| Keywords:                       | Chronic airways disease < THORACIC MEDICINE, Epidemiology < THORACIC MEDICINE, Adult thoracic medicine < THORACIC MEDICINE, EPIDEMIOLOGY, HEALTH ECONOMICS                                                                                                                                                                                                                                                                                                      |
|                                 |                                                                                                                                                                                                                                                                                                                                                                                                                                                                 |

SCHOLARONE™  
Manuscripts

Only

# Direct and indirect economic and health consequences of COPD in Denmark - 1998-2010.

Anders Løkke<sup>1</sup>, Ole hilberg<sup>1</sup>, Philip Tønnesen<sup>2</sup>, Jakob Kjellberg<sup>3</sup>, Rikke Ibsen<sup>4</sup>, Poul Jennum<sup>5</sup>

1. Department of Respiratory Medicine, Aarhus County Hospital, Aarhus, Denmark.
2. Department of Pulmonary Medicine, Gentofte University Hospital, Denmark.
3. Danish Institute for Health Services Research, Copenhagen, Denmark.
4. Itracks, Klosterport 4E, Aarhus, Denmark.
5. Danish Center for Sleep Medicine, Department of Clinical Neurophysiology, Center for Healthy Ageing, Faculty of Health Sciences, University of Copenhagen, Glostrup Hospital, Copenhagen, Denmark.

**Correspondence:**

Anders Løkke  
Voldgårdsvej 15  
8270 Højbjerg  
Denmark  
[aloekke@gmail.com](mailto:aloekke@gmail.com)

**Key words:**

Chronic obstructive pulmonary disease, illness costs, health costs, economic burden, employment.

**Conflicts of interest:**

None of the authors have any conflicts of interest, nor do they have any financial disclosures to make.

**Funding:**

This study was supported by an unrestricted grant from the Respiroics Foundation and from a grant from Center for Healthy Aging, Faculty of Health Sciences, University of Copenhagen. The study is a part of a larger study supported by the Center of Healthy Aging, Faculty of Health Sciences, University of Copenhagen, with the purpose of identifying the burden of chronic diseases. None of the funders had any influence on the study design, the collection, analysis and interpretation of the data, the writing of the report, or the decision to submit the paper for publication.

**Competing interests:** None.

**Ethics approval:**

The study was approved by the Danish Data Protection Agency. Because data handling was anonymous, individual and ethical approval was not mandatory.

**Provenance and peer review:**

Not commissioned; externally peer reviewed.

**Author Contribution:**

Anders Løkke: Planning, Statistics, Writing and Discussion.

Ole Hilberg: Planning, Writing and Discussion.

Philip Tønnesen: Writing and Discussion.

Jakob Kjellberg: Planning, Statistics and Writing.

Rikke Ibsen: Statistics and Writing.

Poul Jennum: Planning, Writing and Discussion.

**Abstract**

**Objective:** Chronic Obstructive Pulmonary Disease (COPD) is among the leading causes of morbidity and mortality worldwide, but longitudinal studies of the economic consequences of COPD are scarce. This Danish study evaluated for the first time ever the economic consequences of COPD of an entire nation before and after the diagnosis.

**Methods:** Using records from the Danish National Patient Registry (1998-2010), 131,811 patients with COPD were identified and compared with 131,811 randomly selected controls matched for age, gender, educational level, residence, and marital status. Direct and indirect costs, including frequency of primary and secondary sector contacts and procedures, medication, unemployment benefits and social transfer payments were extracted from national databases.

**Results:** Patients with COPD had poor survival. The average (95% CI) 12-year survival rate was 0.364 (0.364-0.368) compared with 0.686 among controls (0.682-0.690). COPD was associated with significantly higher rates of health-related contacts, medication use and higher socioeconomic costs. The employment and the income rates of employed COPD patients were significantly lower compared to controls. The annual net costs, including social transfers were €8,572 for COPD patients. These consequences were present up to 11 years before first time diagnosis in the secondary health care sector and became more pronounced with disease advancement.

**Conclusion:** This study provides unique national data on direct and indirect costs before and after initial diagnosis with COPD in Denmark as well as mortality, health and economic consequences for the individual and for society. It could be speculated that early identification and intervention might contribute to the solution.

## Article Summary

### Article Focus:

- To show the socioeconomic impact of COPD before and after initial diagnosis.
- To provide national data regarding health and mortality of COPD patients before and after diagnosis.
- To provide extended national data regarding direct and indirect costs of COPD.

### Key Messages:

- Patients with an initial primary or secondary diagnosis of COPD had poor survival. The average (95% CI) 12-year survival rate was 0.364 (0.364-0.368) compared with 0.686 among controls (0.682-0.690).
- COPD was associated with significantly higher rates of health-related contacts, medication use and higher socioeconomic costs. The employment rates and the income rates of employed COPD patients were significantly lower compared to controls.
- These consequences were present up to 11 years before first diagnosis in the secondary sector and became more pronounced with disease advancement.

### Strengths and limitations:

- This study truly is unique – providing for the first time ever complete and highly relevant data regarding health and direct and indirect costs of COPD of an entire nation over a time period of 12 years.
- The 12 year time-window gives a unique possibility to look backwards and forwards from the point of initial diagnosis.
- This epidemiological study is solely based on information from national databases leading to some limitations.
- The results do not reflect the impact of COPD per se as the pronounced comorbidities of COPD patients (depression, anxiety, cardiovascular disease etc.) will have an impact, too.

## Introduction

Chronic Obstructive Pulmonary Disease (COPD) is among the leading causes of morbidity and mortality worldwide, but longitudinal studies of the economic consequences of COPD are scarce (1, 2).

Smoking, though not necessarily number of pack years, is slowly declining in the Western world but continues to rise elsewhere and it is estimated that the global impact of COPD will increase in the years to come (3-5).

Estimates of COPD prevalence in industrialized countries range widely reflecting both true differences as well as differences in the definition of COPD and in the diagnostic tools used. Most studies find a 10–15% prevalence of COPD in people from 35-40 years and older (6-11). The 17.4% prevalence of COPD in Denmark reported in The Copenhagen City Heart Study is among the highest in the world (12).

The burden of COPD on the health care sector is substantial and has been described and documented in previous cost-of-illness studies concentrating on treatment of COPD and not considering comorbidity (13-20).

Furthermore, the information and assumption of costs have focused on direct costs because indirect costs have generally not been available. Thus, an estimate of total costs of COPD has not yet been achieved.

In Denmark, it is possible to calculate direct and indirect costs of any given disease because information from public and private hospitals and clinics in the primary and secondary care sectors, including medication, social factors, educational level, income and employment data from all patients is registered in central databases and be linked by the unique civil registration number assigned to all Danish citizens facilitating easy and reliable linkage of data. The aim of this study was to evaluate the direct and indirect economic burden of COPD in Denmark before and after initial diagnosis.

## Methods

In Denmark, all hospital contacts (Emergency Rooms, ambulatory visits, Admittances etc.), primary and secondary diagnoses are registered in the National Patient Registry (NPR) (21). The NPR includes administrative information, diagnoses, and diagnostic and treatment procedures using

1  
2  
3  
4 several international classification systems, including the International Statistical Classification of  
5 Diseases and Related Health Problems 10th Revision (ICD-10 Version: 2010).

6  
7 The NPR is a time-based national database that includes data from all inpatient and outpatient  
8 contact, so the data that we extracted are representative of all patients in Denmark who has received  
9 a first time primary and secondary diagnosis of COPD irrespective of other diagnoses. As data are  
10 available for the entire observation period, we can trace patients retrospectively and prospectively  
11 relative to the time of their diagnosis. Furthermore, all contacts in the primary sector (general  
12 practice and specialist care) and the use of medications are recorded in the databases of the National  
13 Health Security and the Danish Health and Medicines Agency, respectively.  
14

15  
16 Even though the study is evaluating a relatively long period of time, there is a risk of  
17 underestimating the number of patients with COPD, since those with a contact in the primary sector  
18 only but not in the secondary sector are recorded as having had contact but not as having received a  
19 diagnosis.  
20  
21  
22  
23  
24  
25  
26

27 We extracted the following first time primary or secondary diagnoses from the NPR in the time  
28 period 1998-2010: “J44 Other chronic obstructive pulmonary disease” comprised by the  
29 following sub-diagnoses: “J44.0 Chronic obstructive pulmonary disease with acute lower  
30 respiratory infection”, J44.1 Chronic obstructive pulmonary disease with acute exacerbation,  
31 unspecified” and “J44.9 Chronic obstructive pulmonary disease, unspecified”.  
32  
33 “J44.8 Other specified chronic obstructive pulmonary disease” was excluded as well as “J43  
34 Emphysema” and “J47 Bronchiectasis. Data on disease severity was not available.  
35  
36  
37  
38  
39

40 Using data from the Danish Civil Registration System including information about all partners,  
41 their marital status, social factors, education level, employment, incomes, pensions etc. (22), we  
42 randomly selected controls of the same age, sex and educational level as the patients.  
43  
44 Nor the NPR or any other of the national databases contains information about smoking status.  
45  
46 Social compensation was performed by selecting control subjects residing in the same area of the  
47 country as the patients and with the same marital status. The ratio of control subjects to patients was  
48 1:1. Data from patients and matched control subjects who could not be identified in the Income  
49 Statistics database were excluded from the sample. More than 99% of the observations in the two  
50 groups were successfully matched. Patients and matched controls were followed from 1998 to 2010.  
51  
52 If a patient or control was not present in the registry on 1 January each year due to death,  
53  
54  
55  
56  
57  
58  
59  
60

1  
2  
3  
4 imprisonment or immigration, the corresponding control or patient control was not included in the  
5 dataset for that year.

6  
7 Information about educational level is very robust for everyone between the ages of 14 and 80 with  
8 only little information lacking. On the other hand there is no available information about  
9 educational level for people under the age of 14 years and for a very large proportion of those aged  
10 80 years or more – the latter due to lack of registration of education in the Danish Civil Registration  
11 System database. This registration, based on information from the different teaching institutions, did  
12 not begin until 1970.

13  
14 One could argue that a huge proportion of the unregistered persons are unskilled but we cannot tell  
15 and the problem is the same in the control group. To avoid bias, we excluded all persons with  
16 COPD where proper matching information was missing.

17  
18 Patients and matched controls were followed through the entire time period or until death. If  
19 diagnosis of COPD of any given individual was made in the first year (1998) we were able to  
20 follow that individual 11 years forward in time. If diagnosis of COPD of any given individual was  
21 made in the last year (2010) we were able to follow that individual 11 years backwards in time. If  
22 diagnosis of COPD of any given individual was made between the first and the last year we were  
23 able to follow that individual both backwards and forward in time.

24  
25 Municipal services such as care of the elderly (home care nursing and general home care) and  
26 municipal rehabilitation is not included as they are paid by the municipals.

27  
28 The economic consequences of COPD were estimated by determining the annual costs per patient  
29 diagnosed with COPD and comparing these figures with the healthcare costs in a matched control  
30 group. Diagnosis of COPD is presented to the NPR using information from public and private  
31 hospitals. These diagnoses rely on clinical information and results of diagnostic procedures (e.g.  
32 spirometry, bronchoscopy). The procedures are registered but the results of the diagnostic procedure  
33 are not recorded in the NPR. The health cost was then divided into annual direct and indirect  
34 healthcare costs.

35  
36 Direct costs included the average costs of hospitalization and outpatient treatment, for separate  
37 diagnosis-related groups and specific outpatient costs. These costs were all calculated from Danish  
38 Ministry of Health data using diagnosis- related groups (DRG) and average case-mix costs of  
39



1  
2  
3  
4 hospitals or outpatient costs updated on an annual basis. The use and costs of drugs were obtained  
5 from the Danish Health and Medicines Agency consisting of the retail price of each drug (including  
6 dispensing costs) multiplied by the number of transactions. The frequencies and costs of  
7 consultations with general practitioners and other specialists were based on National Health  
8 Security data.  
9  
10  
11

12  
13 Indirect costs included those related to reduced unemployment benefits and to social transfer  
14 payments. Indirect costs were based on income figures from Income Statistics. Costs were  
15 measured on an annual basis and adjusted to 2010 prices in Euros (€1: DKK 7.45).  
16  
17  
18

19  
20 Cost-of-illness studies measure the economic burden resulting from disease and illness across a  
21 defined population and include direct and indirect costs. Direct costs are the value of resources used  
22 in the treatment, care, and rehabilitation of people with the condition under study. Indirect costs  
23 represent the value of economic resources lost because of disease-related work disability or  
24 premature mortality. As patients leave the national data registers at the time of death, the indirect  
25 costs estimate comprises only the production loss related to disease-related work disability. It is  
26 important to distinguish costs from monetary transfer payments such as disability and welfare  
27 payments. These payments represent a transfer of purchasing power to the recipients from the  
28 general taxpayers but do not represent net increases in the use of resources and, therefore, are not  
29 included in the total cost estimate.  
30  
31  
32  
33  
34  
35  
36  
37  
38  
39

#### 40 Statistical analysis

41 The study was approved by the Danish Data Protection Agency. Data were anonymised and neither  
42 individual consent nor ethical approval was required.  
43

44 The results are presented as means because some patients had a very high resource consumption  
45 which, despite leading to a skewed distribution, would not be adequately represented if data were  
46 presented as median values. Extreme values were manually validated and no errors were identified.  
47 Statistical analysis was performed using SAS 9.1.3 (SAS, Inc., Cary, NC). Statistical significance of  
48 the cost estimates was assessed by nonparametric bootstrap analysis (23, 24).  
49

50 Survival was estimated using the Kaplan-Maier method. Hazard ratio was estimated using the Cox  
51 proportional hazard model.  
52  
53  
54  
55  
56  
57  
58  
59  
60

## Results

We identified and extracted 131,811 patients with COPD from the national databases (1998-2010) and compared with 131,811 randomly selected matched controls. The age distribution and education level of patients are shown in Table 1. There are a little more female than male COPD patients - probably because of the age distribution. As expected, most of the patients with an initial diagnosis of COPD are middle-aged or older.

Figure 1 shows distribution of all the included patients with COPD (in red). In blue are the excluded patients with a diagnosis of “J44.8 Other specified chronic obstructive pulmonary disease” which primarily is younger people with a diagnosis of chronic asthmatic bronchitis.

Figure 2 displays survival distribution of COPD patients and controls showing a decline in survival of COPD patients compared to controls.

The percentages of COPD patients and controls receiving various health care and income is shown in Table 2. COPD is associated with significantly higher rates of health-related contact (Outpatient and Inpatient treatment as well as Primary Care), use more medication, have more persons on various public transfer incomes and less people earning income from employment compared to controls.

The annual average health costs and income of COPD patients before and after diagnosis compared with controls are displayed in Table 3. COPD is associated with significantly higher rates of health-related costs, medication use and lower income rates compared to controls both before and increasingly so after diagnosis.

Figure 3 shows total health expenses, income from employment and public transfer income before and after diagnosis of COPD compared with controls.

For every year the total health expenses are significantly higher for COPD patients. A peak in expenses is seen at the time of diagnosis.

For COPD the income from employment is significantly lower and the total public transfer income is significantly higher than for controls – even 11 years before the diagnosis has been given.

Both effects diminish over time due to people getting older and retiring from work.

1  
2  
3  
4 In Figure 3 the x-axis begins at minus 11 and stops at 11 years. In year zero all cases and their  
5 controls are present. When moving backwards from zero to minus 11, every year will hold less and  
6 less cases (and controls) because the ones diagnosed with COPD in 1998 were not followed  
7 backwards in time, the ones diagnosed with COPD in 1999 were only followed backwards 1 year in  
8 time and so on. The same is true when moving forwards from year zero to year 11 because the ones  
9 diagnosed with COPD in 2010 were not followed forward in time, the ones diagnosed with COPD  
10 in 2009 were only followed forward 1 year in time and so on.

11  
12 One should be cautious to compare one year with another in the figures, because two neighbor years  
13 will not be identical but are composed of some identical cases and some cases that differs  
14 completely.

15  
16 As an example: At year minus 11 the cases diagnosed with COPD in 2010 are shown (thus we are  
17 11 years before the time of the diagnosis). Year minus 10 hold the cases who got diagnosed in 2010  
18 plus the cases diagnosed in 2009 (thus we are 10 years before the time of the diagnosis).

## 29 Discussion

30 To our knowledge, this is the first epidemiological COPD study evaluates the direct and indirect  
31 costs of COPD at a national level.

32  
33 The 12 year time-window gives a unique possibility to look backwards and forwards from the point  
34 of initial diagnosis. Including every person at a national level with a first time diagnosis of COPD  
35 and randomly selected controls matched for age, gender, educational level, residence and marital  
36 status provides a very large amount of persons and data making the direct and indirect results more  
37 complete and robust.

38  
39 The study has provided several information of interest and confirms the following general beliefs  
40 about COPD:

41  
42 Patients with an initial primary or secondary diagnosis of COPD had poor survival. The average  
43 (95% CI) 12-year survival rate was 0.364 (0.364-0.368) compared with 0.686 among controls  
44 (0.682-0.690).

45  
46 COPD was associated with significantly higher rates of health-related contacts, medication use and  
47 higher socioeconomic costs. The employment rates and the income rates of employed COPD  
48 patients were significantly lower compared to controls.

49  
50 The annual net costs after initial diagnosis, including social transfers were €8,572 for COPD

1  
2  
3  
4 patients.

5 These consequences were present up to 11 years before first diagnosis in the secondary sector and  
6 became more pronounced with disease advancement.  
7  
8  
9

10 Determining the economic consequences of COPD is complex. With an accurate diagnosis and  
11 appropriate treatment patients' risk of exacerbation decreases as well as the associated costs and  
12 maybe even death (although still controversial). In addition quality of life improves. On the other  
13 hand the diagnostic procedures, treatment and management of COPD add to the direct costs.  
14 However, even when we include the costs associated with the diagnosis and treatment of COPD,  
15 our study showed that patients with COPD incur a significant economic burden because the lower  
16 employment rates and the lower income rates of employed COPD patients exceed the direct costs of  
17 the disease. These factors influence costs and should be included in the disease burden.  
18  
19  
20  
21  
22  
23  
24

25 This epidemiological study is solely based on information from national databases leading to some  
26 limitations.  
27  
28

29 The results do not reflect the impact of COPD per se as the pronounced comorbidities of COPD  
30 patients (depression, anxiety, cardiovascular disease etc.) will have an impact, too. By adjusting for  
31 the above mentioned available match factor, including educational level, we have tried to minimize  
32 this effect. Ideally, we would have adjusted for smoking status but this information is not registered  
33 in any of the national databases in Denmark.  
34  
35  
36

37 In Denmark ICD-10 classification is only used in the secondary health sector (hospitals) not in the  
38 primary health sector (general practitioners). Even though this study spans 12 years and includes all  
39 with an initial primary or secondary ICD-10 diagnosis of COPD - and the majority of known COPD  
40 patients are believed to be included over time - there is a risk of underestimation. COPD patients  
41 that are only followed in the primary health care sector during the study period are not included and  
42 this will bias the results as these patients will tend to be less sick.  
43  
44  
45  
46  
47  
48

49 The accuracy of the diagnosis and management is sensitive to the diagnostic criteria used by the  
50 reporting doctors. The people aged below 30-40 years with a diagnosis of COPD may – at least to  
51 some extent - be due to misclassification.  
52  
53

54 Furthermore, although J44 by far is the most common diagnosis used in COPD, several different  
55 diagnoses deriving from J40 (bronchitis), J41 (simple and mucopurulent chronic bronchitis), J43  
56  
57  
58  
59  
60

1  
2  
3  
4 (emphysema) and J47 bronchiectasis) are also used to some (unknown) extent. We have chosen to  
5 exclude these diagnoses as well as J44.8 Other specified chronic obstructive pulmonary disease. It  
6 could be argued that a large proportion of these excluded individuals are very likely to have COPD,  
7 but because this is an epidemiologic study, entirely based on registry data, we decided to include  
8 only those with a specific diagnosis of COPD.  
9

10  
11  
12 By allowing both primary and secondary diagnosis of COPD some correction of this problem has  
13 taken place but may have opened up for adding further comorbidity.  
14

15  
16 In the control group there will be a number of undiagnosed patients with COPD (approx. 10%) thus  
17 introducing a bias tending to reduce the difference in costs between the two groups in our study  
18 (25).  
19  
20  
21

22 **Conclusion:** This study provides unique data at a national level regarding direct and indirect costs  
23 before and after initially diagnosed COPD as well as serious mortality, health and economic  
24 consequences for the individual patient and for society.  
25

26  
27 As the economic consequences are present years prior to the first primary or secondary diagnosis of  
28 COPD in the secondary health sector one, it could be speculated that early identification and  
29 intervention might be part of the solution.  
30  
31

32 Adequate treatment may reduce the consequences of COPD but, if socially and economically  
33 significant reductions in morbidity, mortality and social impact are to be achieved, much earlier  
34 disease identification and management are needed More research and evaluation of case finding  
35 strategies and disease management programs are needed (26).  
36  
37  
38  
39  
40  
41  
42  
43  
44  
45  
46  
47  
48  
49  
50  
51  
52  
53  
54  
55  
56  
57  
58  
59  
60

## References

1. <http://www.who.int/en/> visited 18.04.2013.
2. Løkke A, Lange P, Scharling H, Fabricius P, Vestbo J. Developing COPD a 25 year follow up study of the general population. *Thorax* 2006; **61**: 935-39.
3. Decramer M, Janssens W, Miravittles M. Chronic obstructive pulmonary disease. *Lancet* 2012; **379**: 1341-51.
4. <http://www.goldcopd.org> visited 18.04.2013.
5. Murray CJ, Lopez AD. Alternative projections of mortality and disability by cause 1990-2020: Global Burden of Disease Study. *Lancet* 1997; **349**: 1498-1504.
6. Buist AS, Mcburnie MA, Vollmer WM et al. International variation in the prevalence of COPD (The BOLD Study): a population-based prevalence study. *Lancet* 2007; **370**: 741-50.
7. Lindberg A, Jonsson AC, Rönmark E, Lundgren R, Larsson LG, Lundbäck B. Prevalence of chronic obstructive pulmonary disease according to BTS, ERS, GOLD and ATS criteria in relation to doctors' diagnosis, symptoms, age, gender and smoking habits. *Respiration*. 2005; **72**: 471-9.
8. Menezes MB, Perez-Padilla R, Jardim JRB, Muino A, Lopez Mv, Valdivia G et al. Chronic obstructive pulmonary disease in five Latin American cities (the Platino study): a prevalence study. *Lancet* 2005; **366**: 1875-81.
9. Kim DS, Kim YS, Jung KS, Chang JH, Lim CM, Lee JH et al. Prevalence of chronic obstructive pulmonary disease in Korea: a population-based spirometry survey. *Am J Respir Crit Care Med*. 2005; **172**: 842-7.
10. Menezes AM, Victora CG, Rigatto M. Prevalence and risk factors for chronic bronchitis in Pelotas, RS, Brazil: a population-based study. *Thorax*. 1994; **49**: 1217-21.
11. Fukuchi Y, Nishimura M, Ichinose M, Adachi M, Nagai A, Kuriyama T, Takahashi K, Nishimura K, Ishioka S, Aizawa H, Zaher C. COPD in Japan: the Nippon COPD Epidemiology study. *Respirology*. 2004 Nov; **9** (4): 458-65.
12. Løkke A, Fabricius PG, Vestbo J, Marott JL, Lange P. Prevalence of chronic obstructive pulmonary disease in Copenhagen. Results from The Copenhagen City Heart Study. *Ugeskr Laeger*. 2007 Nov 12; **169** (46): 3956-60.
13. Detournay B, Pribil D, Fournier M, Housset B, Huchon G, Huas D, et al. The SCOPE Study: health-care consumption related to patients with chronic obstructive pulmonary disease in France. *Value Health*. 2004; **7**: 168-74.

14. Dahl R, Lofdahl CG, editors. The economic impact of COPD in North America and Europe. Analysis of the confronting COPD survey. *Respir Med.* 2003; **97**(Suppl. C).
15. Wouters EFM. Economic analysis of the confronting COPD survey: an overview of the results. *Respir Med.* 2003; **97**(Suppl. C): S3–S14.
16. Grasso ME, Weller WE, Shaffer TJ, Diette GB, Anderson GF. Capitation, managed care and chronic obstructive pulmonary disease. *Am J Respir Crit Care Med.* 1998; **158**: 133–8.
17. Dal Negro RW, Tognella S, Tosatto R, Dionisi M, Turco P, Donner CF. Costs of chronic obstructive pulmonary disease (COPD) in Italy: The SIRIO study (Social Impact of Respiratory Integrated Outcomes). *Respir Med.* 2008; **102**: 92–101.
18. Menn P, Heinrich J, Huber RM, Jörres RA, John J et al. for the KORA Study Group. Direct medical costs of COPD - An excess cost approach based on two population-based studies. *Respir Med.* 2012; **106**: 540-8. Epub 2011 Nov 18.
19. Blanchette CM, Roberts MH, Petersen H, Dalal AA, Mapel DW. Economic burden of chronic bronchitis in the United States: a retrospective case-control study. *International Journal of COPD.* 2011; **6**: 73–81.
20. Bilde L, Rud SA, Dollerup J, Baekke BH, Lange P. The cost of treating patients with COPD in Denmark--a population study of COPD patients compared with non-COPD controls. *Respir Med.* 2007; **101**: 539-46. Epub 2006 Aug 4.
21. Lynge E, Sandegaard JL, Rebolj M. The Danish National patient Register (in Danish). *Scand J Public Health* 2011; **39**: 30-3.
22. Pedersen CB. The Danish Civil Registration System (in Danish). *Scand J Public Health* 2011; **39**: 22-5.
23. Agresti A. Categorical Data Analysis. 2<sup>nd</sup> ed. New York: Wiley; 2002.
24. Efron B, Tibshirani RJ. An Introduction to the Bootstrap. London: Chapman & Hall, 1993. 2008.
25. Shahab L, Jarvis MJ, Britton J, West R. Prevalence, diagnosis and relation to tobacco dependence of chronic obstructive pulmonary disease in a nationally representative population sample. *Thorax.* 2006; **61**:1043-7. Epub 2006 Oct 13.
26. Løkke A, Ulrik CS, Dahl R, Plauborg L, Dollerup J, Kristiansen LC, Cording PH, Dehlendorff C. Detection of previously undiagnosed cases of COPD in a high-risk population identified in general practice. *COPD.* 2012; **9**: 458-65. Epub 2012 May 29.

**Table 1:** Age, gender and education level distribution of COPD patients.

| Gender                  | N              | Percentage |
|-------------------------|----------------|------------|
| Male                    | 63,342         | 48.1       |
| Female                  | 68,469         | 51.9       |
| Married or co-habiting  |                | 54.0       |
| <b>Age distribution</b> |                |            |
| <14                     | -              | -          |
| 14-20                   | 136            | 0.1        |
| 20-29                   | 394            | 0.3        |
| 30-39                   | 1,717          | 1.3        |
| 40-49                   | 6,664          | 5.1        |
| 50-59                   | 19,601         | 14.9       |
| 60-69                   | 38,297         | 29.1       |
| 70-79                   | 51,524         | 39.1       |
| 80-92                   | 13,478         | 10.2       |
| ≥92                     | -              | -          |
| <b>Education level</b>  |                |            |
| Primary                 | 80,483         | 61.1       |
| Secondary               | 864            | 0.7        |
| Vocational              | 40,050         | 30.4       |
| Short college           | 1,824          | 1.4        |
| Medium college          | 6,784          | 5.1        |
| Master/PhD              | 1,806          | 1.4        |
| Total                   | <b>131,811</b> | 100.0      |



**Figure 1:** Distribution of included (red) and excluded cases (blue) on the basis of diagnosis according to age (x-axis) and number (y-axis).

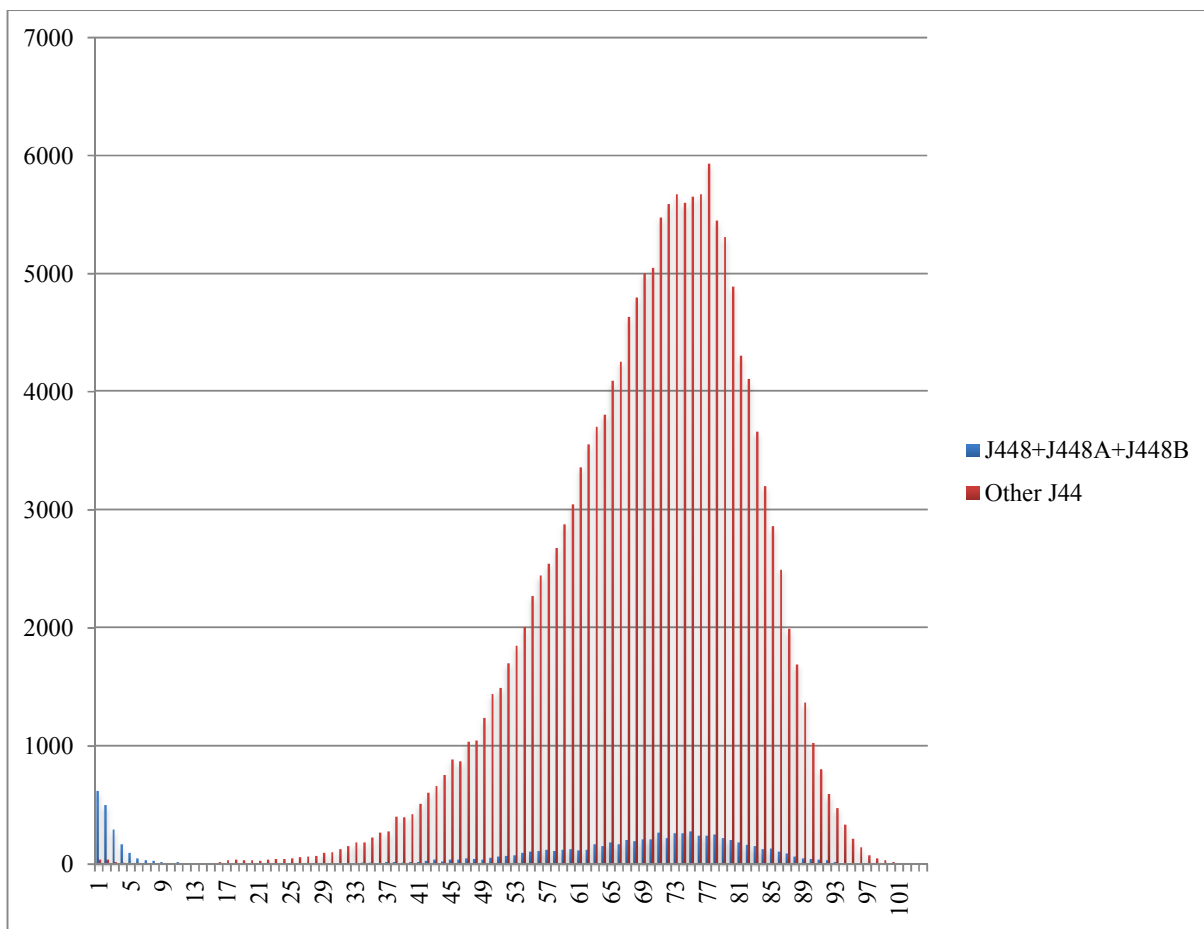

**Figure 2:** Kaplan-Maier survival distribution of COPD patients (blue) and controls (red) estimated using Cox proportional hazard model.

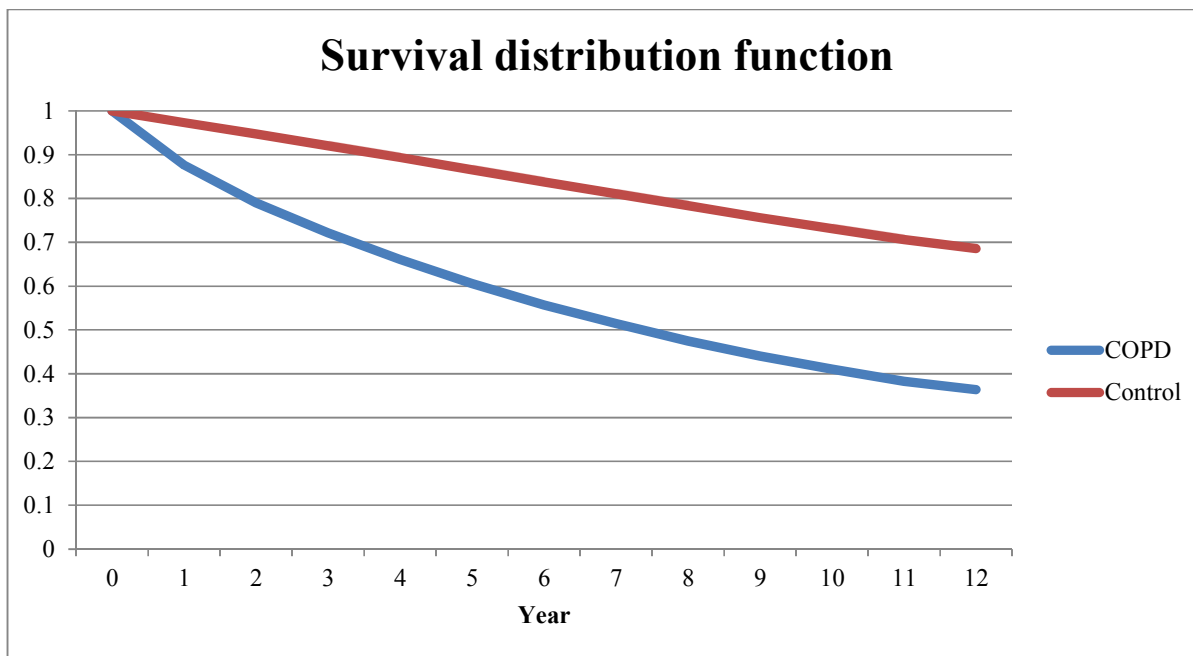

|                        | COPD        |                                         |                                   | Control                           |                                         |                                   |                                   |
|------------------------|-------------|-----------------------------------------|-----------------------------------|-----------------------------------|-----------------------------------------|-----------------------------------|-----------------------------------|
| <b>Survival</b>        |             |                                         |                                   |                                   |                                         |                                   |                                   |
|                        | Year        | Survival Distribution Function Estimate | SDF Upper 95.00% Confidence Limit | SDF Lower 95.00% Confidence Limit | Survival Distribution Function Estimate | SDF Upper 95.00% Confidence Limit | SDF Lower 95.00% Confidence Limit |
|                        | 0           | 1,000                                   | 1,000                             | 1,000                             | 1,000                                   | 1,000                             | 1,000                             |
|                        | 1           | 0,876                                   | 0,878                             | 0,875                             | 0,973                                   | 0,974                             | 0,972                             |
|                        | 2           | 0,790                                   | 0,792                             | 0,788                             | 0,948                                   | 0,949                             | 0,946                             |
|                        | 3           | 0,722                                   | 0,725                             | 0,720                             | 0,921                                   | 0,922                             | 0,919                             |
|                        | 4           | 0,661                                   | 0,664                             | 0,659                             | 0,894                                   | 0,895                             | 0,892                             |
|                        | 5           | 0,606                                   | 0,609                             | 0,603                             | 0,866                                   | 0,867                             | 0,864                             |
|                        | 6           | 0,557                                   | 0,560                             | 0,554                             | 0,838                                   | 0,840                             | 0,836                             |
|                        | 7           | 0,515                                   | 0,518                             | 0,512                             | 0,811                                   | 0,813                             | 0,808                             |
|                        | 8           | 0,475                                   | 0,478                             | 0,472                             | 0,784                                   | 0,786                             | 0,781                             |
|                        | 9           | 0,441                                   | 0,444                             | 0,437                             | 0,757                                   | 0,760                             | 0,754                             |
|                        | 10          | 0,410                                   | 0,414                             | 0,407                             | 0,731                                   | 0,734                             | 0,728                             |
|                        | 11          | 0,383                                   | 0,387                             | 0,379                             | 0,706                                   | 0,710                             | 0,703                             |
|                        | 12          | 0,364                                   | 0,368                             | 0,360                             | 0,686                                   | 0,690                             | 0,682                             |
| <b>Censored</b>        | N           | 131,811                                 |                                   |                                   | 131,811                                 |                                   |                                   |
|                        | % censored  | 53.5                                    |                                   |                                   | 80.2                                    |                                   |                                   |
| <b>Hazard function</b> | HazardRatio | 0,33                                    |                                   |                                   |                                         |                                   |                                   |
|                        | ProbChiSq   | 0,00                                    |                                   |                                   |                                         |                                   |                                   |
|                        | StdErr      | 0,01                                    |                                   |                                   |                                         |                                   |                                   |

**Table 2:** Percentages of COPD patients and controls that receive income and various health care services (after diagnosis).

|                                     |   | COPD | Controls | P-value |
|-------------------------------------|---|------|----------|---------|
| <b>Outpatient treatment</b>         | % | 64.9 | 36.2     | <0.01   |
| <b>Inpatient treatment</b>          | % | 53.8 | 18.8     | <0.01   |
| <b>Medication</b>                   | % | 98.1 | 85.9     | <0.01   |
| <b>Public health insurance</b>      | % | 99.0 | 95.6     | <0.01   |
| <b>Income from employment</b>       | % | 16.7 | 23.8     | <0.01   |
| <b>Public transfer income total</b> | % | 90.3 | 83.8     | <0.01   |
| <i>Pension</i>                      | % | 60.3 | 63.8     | <0.01   |
| <i>Other public transfers</i>       | % | 27.6 | 18.6     | <0.01   |
| <i>Sickpay (publicly funded)</i>    | % | 5.5  | 3.6      | <0.01   |

(Bootstrapped Cochran-Armitage test showing whether the fraction received is significant for each expense type). The values given are in percentages.

**Table 3:** Health costs and income of COPD patients before and after diagnosis compared with controls.

|                         |                                          |   | COPD          | Controls     | P-value |
|-------------------------|------------------------------------------|---|---------------|--------------|---------|
| <b>Before diagnosis</b> | <b>N</b>                                 |   | 708,329       | 708,343      |         |
|                         | <b>Outpatient treatment</b>              | € | 335           | 227          | <0.01   |
|                         | <b>Inpatient treatment</b>               | € | 1,534         | 904          | <0.01   |
|                         | <b>Medication</b>                        | € | 918           | 434          | <0.01   |
|                         | <b>Public health insurance</b>           | € | 357           | 278          | <0.01   |
|                         | <b>Income from employment</b>            | € | 7,947         | 11,418       | <0.01   |
|                         | <b>Public transfer income total</b>      | € | 12,858        | 11,167       |         |
|                         | <i>Pension</i>                           | € | 7,029         | 6,824        | <0.01   |
|                         | <i>Other public transfers</i>            | € | 5,450         | 4,104        | <0.01   |
|                         | <i>Sickpay (public funded)</i>           | € | 378           | 238          | <0.01   |
|                         | <b>Direct health costs</b>               | € | 3,144         | 1,843        |         |
|                         | <b>Indirect costs, foregone earnings</b> | € | 3,471         |              |         |
|                         | <b>Sum of direct and indirect costs</b>  | € | <b>6,616</b>  | <b>1,843</b> |         |
|                         | <b>Net costs</b>                         | € | 4,773         |              |         |
|                         | <b>Social transfer payments</b>          | € | 12,858        | 11,167       |         |
|                         | <b>Net costs including transfers</b>     | € | <b>6,464</b>  |              |         |
| <b>After diagnosis</b>  | <b>N</b>                                 | N | 597,235       | 776,674      |         |
|                         | <b>Outpatient treatment</b>              | € | 789           | 429          | <0.01   |
|                         | <b>Inpatient treatment</b>               | € | 5,563         | 1,736        | <0.01   |
|                         | <b>Medication</b>                        | € | 1,782         | 610          | <0.01   |
|                         | <b>Public health insurance</b>           | € | 515           | 361          | <0.01   |
|                         | <b>Income from employment</b>            | € | 4,509         | 6,800        | <0.01   |
|                         | <b>Public transfer income total</b>      | € | 13,888        | 13,122       |         |
|                         | <i>Pension</i>                           | € | 9,171         | 10,317       | <0.01   |
|                         | <i>Other public transfers</i>            | € | 4,361         | 2,634        | <0.01   |
|                         | <i>Sickpay (publicly funded)</i>         | € | 356           | 171          | <0.01   |
|                         | <b>Direct health costs</b>               | € | 8,650         | 3,135        |         |
|                         | <b>Indirect costs, foregone earnings</b> | € | 2,291         |              |         |
|                         | <b>Sum of direct and indirect costs</b>  | € | <b>10,941</b> | <b>3,135</b> |         |
|                         | <b>Net costs</b>                         | € | 7,806         |              |         |
|                         | <b>Social transfer payments</b>          | € | 13,888        | 13,122       |         |
|                         | <b>Net costs including transfers</b>     | € | <b>8,572</b>  |              |         |

(Yearly costs calculated as the average costs with respect to income per year. N = summarized number of individuals × years observed. P-value from bootstrapped t-test. The values given are in Euros).

**Figure 3:** Total health expenses, income from employment and public transfer income in Euros before and after diagnosis of COPD (green) compared with control subjects (blue).

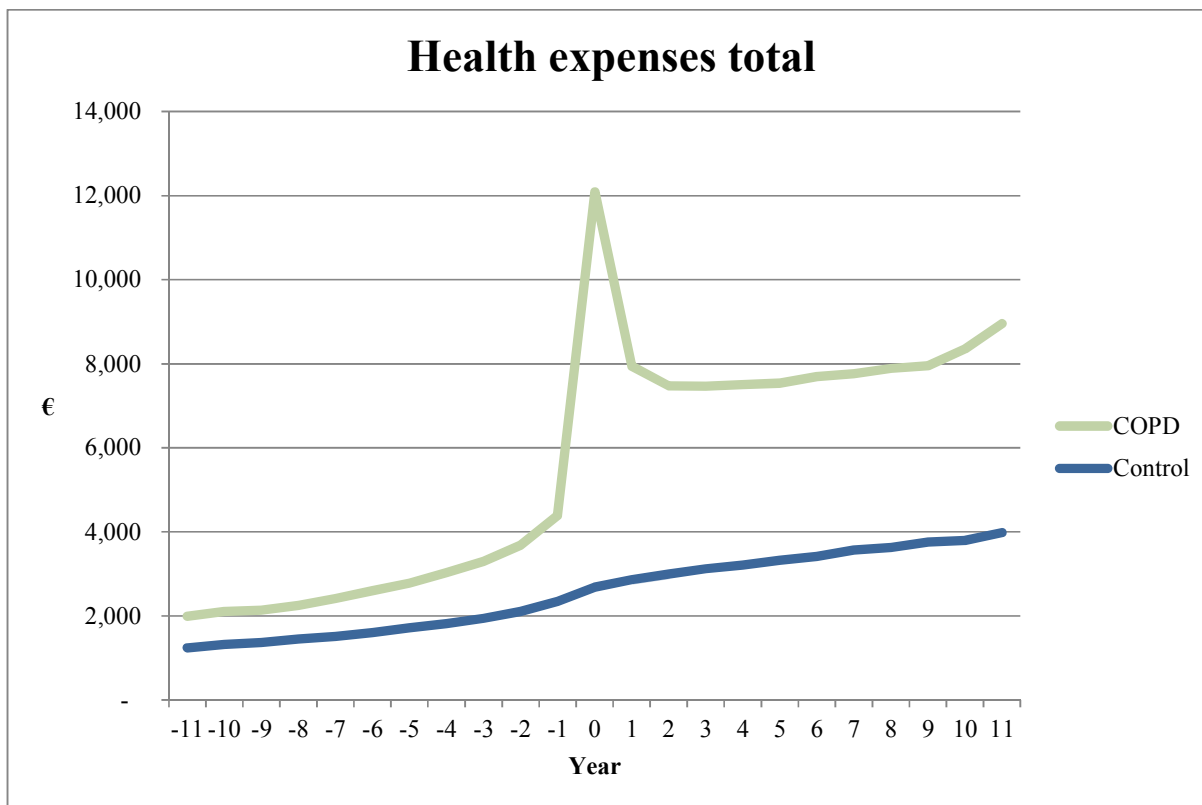

ew only

1  
2  
3  
4  
5  
6  
7  
8  
9  
10  
11  
12  
13  
14  
15  
16  
17  
18  
19  
20  
21  
22  
23  
24  
25  
26  
27  
28  
29  
30  
31  
32  
33  
34  
35  
36  
37  
38  
39  
40  
41  
42  
43  
44  
45  
46  
47  
48  
49  
50  
51  
52  
53  
54  
55  
56  
57  
58  
59  
60

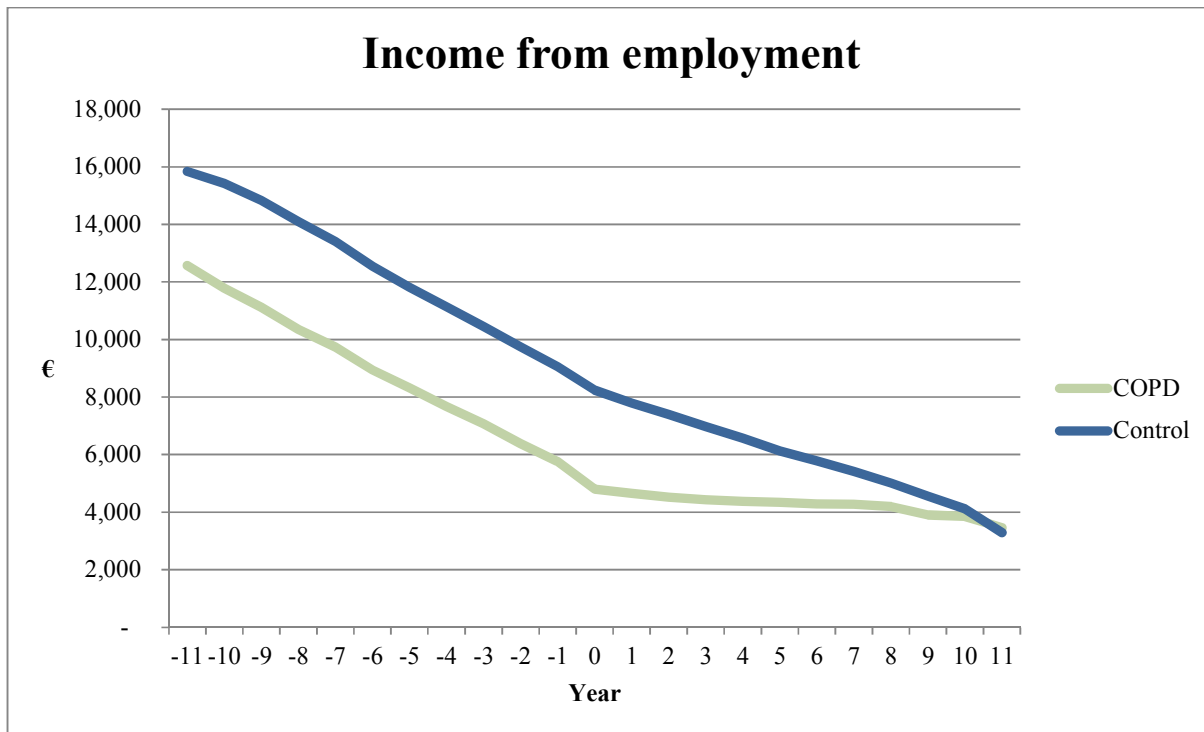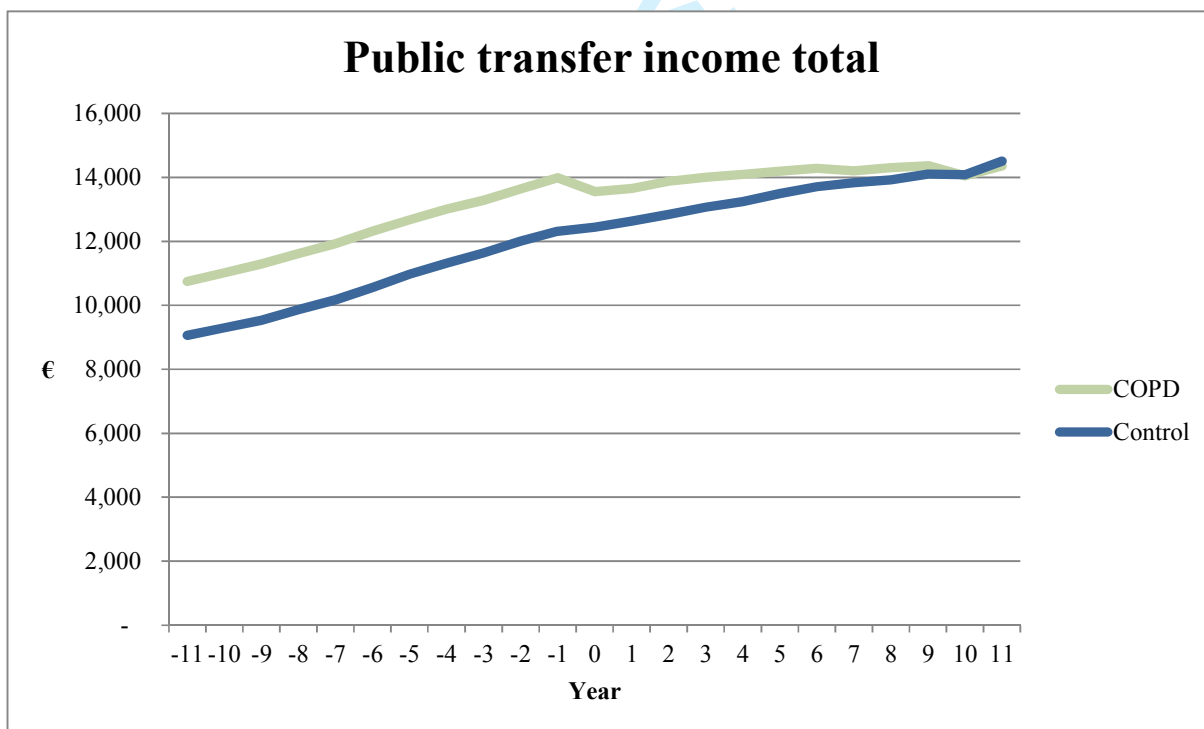

STROBE Statement—Checklist of items that should be included in reports of *cohort studies*

|                              | Item No | Recommendation                                                                                                                                                                                                                                                                                                                                                                                                |
|------------------------------|---------|---------------------------------------------------------------------------------------------------------------------------------------------------------------------------------------------------------------------------------------------------------------------------------------------------------------------------------------------------------------------------------------------------------------|
| <b>Title and abstract</b>    | 1       | (a) Indicate the study's design with a commonly used term in the title or the abstract<br>(b) Provide in the abstract an informative and balanced summary of what was done and what was found                                                                                                                                                                                                                 |
| <b>Introduction</b>          |         |                                                                                                                                                                                                                                                                                                                                                                                                               |
| Background/rationale         | 2       | Explain the scientific background and rationale for the investigation being reported                                                                                                                                                                                                                                                                                                                          |
| Objectives                   | 3       | State specific objectives, including any prespecified hypotheses                                                                                                                                                                                                                                                                                                                                              |
| <b>Methods</b>               |         |                                                                                                                                                                                                                                                                                                                                                                                                               |
| Study design                 | 4       | Present key elements of study design early in the paper                                                                                                                                                                                                                                                                                                                                                       |
| Setting                      | 5       | Describe the setting, locations, and relevant dates, including periods of recruitment, exposure, follow-up, and data collection                                                                                                                                                                                                                                                                               |
| Participants                 | 6       | (a) Give the eligibility criteria, and the sources and methods of selection of participants. Describe methods of follow-up<br>(b) For matched studies, give matching criteria and number of exposed and unexposed                                                                                                                                                                                             |
| Variables                    | 7       | Clearly define all outcomes, exposures, predictors, potential confounders, and effect modifiers. Give diagnostic criteria, if applicable                                                                                                                                                                                                                                                                      |
| Data sources/<br>measurement | 8*      | For each variable of interest, give sources of data and details of methods of assessment (measurement). Describe comparability of assessment methods if there is more than one group                                                                                                                                                                                                                          |
| Bias                         | 9       | Describe any efforts to address potential sources of bias                                                                                                                                                                                                                                                                                                                                                     |
| Study size                   | 10      | Explain how the study size was arrived at                                                                                                                                                                                                                                                                                                                                                                     |
| Quantitative variables       | 11      | Explain how quantitative variables were handled in the analyses. If applicable, describe which groupings were chosen and why                                                                                                                                                                                                                                                                                  |
| Statistical methods          | 12      | (a) Describe all statistical methods, including those used to control for confounding<br>(b) Describe any methods used to examine subgroups and interactions<br>(c) Explain how missing data were addressed<br>(d) If applicable, explain how loss to follow-up was addressed<br>(e) Describe any sensitivity analyses                                                                                        |
| <b>Results</b>               |         |                                                                                                                                                                                                                                                                                                                                                                                                               |
| Participants                 | 13*     | (a) Report numbers of individuals at each stage of study—eg numbers potentially eligible, examined for eligibility, confirmed eligible, included in the study, completing follow-up, and analysed<br>(b) Give reasons for non-participation at each stage<br>(c) Consider use of a flow diagram                                                                                                               |
| Descriptive data             | 14*     | (a) Give characteristics of study participants (eg demographic, clinical, social) and information on exposures and potential confounders<br>(b) Indicate number of participants with missing data for each variable of interest<br>(c) Summarise follow-up time (eg, average and total amount)                                                                                                                |
| Outcome data                 | 15*     | Report numbers of outcome events or summary measures over time                                                                                                                                                                                                                                                                                                                                                |
| Main results                 | 16      | (a) Give unadjusted estimates and, if applicable, confounder-adjusted estimates and their precision (eg, 95% confidence interval). Make clear which confounders were adjusted for and why they were included<br>(b) Report category boundaries when continuous variables were categorized<br>(c) If relevant, consider translating estimates of relative risk into absolute risk for a meaningful time period |

|    |                          |    |                                                                                        |
|----|--------------------------|----|----------------------------------------------------------------------------------------|
| 1  | Other analyses           | 17 | Report other analyses done—eg analyses of subgroups and interactions, and              |
| 2  |                          |    | sensitivity analyses                                                                   |
| 3  | <b>Discussion</b>        |    |                                                                                        |
| 4  | Key results              | 18 | Summarise key results with reference to study objectives                               |
| 5  | Limitations              | 19 | Discuss limitations of the study, taking into account sources of potential bias or     |
| 6  |                          |    | imprecision. Discuss both direction and magnitude of any potential bias                |
| 7  | Interpretation           | 20 | Give a cautious overall interpretation of results considering objectives, limitations, |
| 8  |                          |    | multiplicity of analyses, results from similar studies, and other relevant evidence    |
| 9  | Generalisability         | 21 | Discuss the generalisability (external validity) of the study results                  |
| 10 | <b>Other information</b> |    |                                                                                        |
| 11 | Funding                  | 22 | Give the source of funding and the role of the funders for the present study and, if   |
| 12 |                          |    | applicable, for the original study on which the present article is based               |
| 13 |                          |    |                                                                                        |
| 14 |                          |    |                                                                                        |
| 15 |                          |    |                                                                                        |
| 16 |                          |    |                                                                                        |
| 17 |                          |    |                                                                                        |
| 18 |                          |    |                                                                                        |
| 19 |                          |    |                                                                                        |
| 20 |                          |    |                                                                                        |
| 21 |                          |    |                                                                                        |
| 22 |                          |    |                                                                                        |
| 23 |                          |    |                                                                                        |
| 24 |                          |    |                                                                                        |
| 25 |                          |    |                                                                                        |
| 26 |                          |    |                                                                                        |
| 27 |                          |    |                                                                                        |
| 28 |                          |    |                                                                                        |
| 29 |                          |    |                                                                                        |
| 30 |                          |    |                                                                                        |
| 31 |                          |    |                                                                                        |
| 32 |                          |    |                                                                                        |
| 33 |                          |    |                                                                                        |
| 34 |                          |    |                                                                                        |
| 35 |                          |    |                                                                                        |
| 36 |                          |    |                                                                                        |
| 37 |                          |    |                                                                                        |
| 38 |                          |    |                                                                                        |
| 39 |                          |    |                                                                                        |
| 40 |                          |    |                                                                                        |
| 41 |                          |    |                                                                                        |
| 42 |                          |    |                                                                                        |
| 43 |                          |    |                                                                                        |
| 44 |                          |    |                                                                                        |
| 45 |                          |    |                                                                                        |
| 46 |                          |    |                                                                                        |
| 47 |                          |    |                                                                                        |
| 48 |                          |    |                                                                                        |
| 49 |                          |    |                                                                                        |
| 50 |                          |    |                                                                                        |
| 51 |                          |    |                                                                                        |
| 52 |                          |    |                                                                                        |
| 53 |                          |    |                                                                                        |
| 54 |                          |    |                                                                                        |
| 55 |                          |    |                                                                                        |
| 56 |                          |    |                                                                                        |
| 57 |                          |    |                                                                                        |
| 58 |                          |    |                                                                                        |
| 59 |                          |    |                                                                                        |
| 60 |                          |    |                                                                                        |

\*Give information separately for exposed and unexposed groups.

**Note:** An Explanation and Elaboration article discusses each checklist item and gives methodological background and published examples of transparent reporting. The STROBE checklist is best used in conjunction with this article (freely available on the Web sites of PLoS Medicine at <http://www.plosmedicine.org/>, Annals of Internal Medicine at <http://www.annals.org/>, and Epidemiology at <http://www.epidem.com/>). Information on the STROBE Initiative is available at <http://www.strobe-statement.org>.



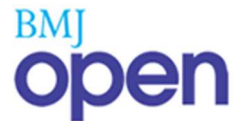

**Direct and indirect economic and health consequences of COPD in Denmark - A national register based study - 1998-2010.**

|                                 |                                                                                                                                                                                                                                                                                                                                                                                                                                                                 |
|---------------------------------|-----------------------------------------------------------------------------------------------------------------------------------------------------------------------------------------------------------------------------------------------------------------------------------------------------------------------------------------------------------------------------------------------------------------------------------------------------------------|
| Journal:                        | <i>BMJ Open</i>                                                                                                                                                                                                                                                                                                                                                                                                                                                 |
| Manuscript ID:                  | bmjopen-2013-004069.R1                                                                                                                                                                                                                                                                                                                                                                                                                                          |
| Article Type:                   | Research                                                                                                                                                                                                                                                                                                                                                                                                                                                        |
| Date Submitted by the Author:   | 28-Nov-2013                                                                                                                                                                                                                                                                                                                                                                                                                                                     |
| Complete List of Authors:       | Løkke, Anders; Aarhus University Hospital, Lung Department, B Hilberg, Ole; Aarhus University Hospital, Lung Department, B Tønnesen, Philip; Gentofte University Hospital, Lung Department Ibsen, Rikke; itracks, Kjellberg, Jakob; Danish Institute for Local and Regional Government Research, Jennum, Poul; Glostrup Hospital, Danish Center for Sleep Medicine, Department of Clinical Neurophysiology; University of Copenhagen, Center for Healthy Ageing |
| <b>Primary Subject Heading</b>: | Respiratory medicine                                                                                                                                                                                                                                                                                                                                                                                                                                            |
| Secondary Subject Heading:      | Epidemiology, Health economics                                                                                                                                                                                                                                                                                                                                                                                                                                  |
| Keywords:                       | Chronic airways disease < THORACIC MEDICINE, Epidemiology < THORACIC MEDICINE, Adult thoracic medicine < THORACIC MEDICINE, EPIDEMIOLOGY, HEALTH ECONOMICS                                                                                                                                                                                                                                                                                                      |
|                                 |                                                                                                                                                                                                                                                                                                                                                                                                                                                                 |

SCHOLARONE™  
Manuscripts

# Direct and indirect economic and health consequences of COPD in Denmark – A national register based study - 1998-2010.

Anders Løkke<sup>1</sup>, Ole hilberg<sup>1</sup>, Philip Tønnesen<sup>2</sup>, Rikke Ibsen<sup>4</sup>, Jakob Kjellberg<sup>3</sup>, Poul Jennum<sup>5</sup>

1. Department of Respiratory Medicine, Aarhus County Hospital, Aarhus, Denmark.
2. Department of Pulmonary Medicine, Gentofte University Hospital, Denmark.
3. Danish Institute for Health Services Research, Copenhagen, Denmark.
4. Itracks, Klosterport 4E, Aarhus, Denmark.
5. Danish Center for Sleep Medicine, Department of Clinical Neurophysiology, Center for Healthy Ageing, Faculty of Health Sciences, University of Copenhagen, Glostrup Hospital, Copenhagen, Denmark.

**Correspondence:**

Anders Løkke  
Voldgårdsvej 15  
8270 Højbjerg  
Denmark  
[aloekke@gmail.com](mailto:aloekke@gmail.com)

**Key words:**

Chronic obstructive pulmonary disease, illness costs, health costs, economic burden, employment.

## Abstract

**Objective:** Chronic Obstructive Pulmonary Disease (COPD) is among the leading causes of morbidity and mortality worldwide, but longitudinal studies of the economic consequences of COPD are scarce. This Danish study evaluated for the first time ever the economic consequences of COPD of an entire nation before and after the diagnosis.

**Methods:** Using records from the Danish National Patient Registry (1998-2010), 131,811 patients with COPD were identified and compared with 131,811 randomly selected controls matched for age, gender, educational level, residence, and marital status. Direct and indirect costs, including frequency of primary and secondary sector contacts and procedures, medication, unemployment benefits and social transfer payments were extracted from national databases.

**Results:** Patients with COPD had poor survival. The average (95% CI) 12-year survival rate was 0.364 (0.364-0.368) compared with 0.686 among controls (0.682-0.690). COPD was associated with significantly higher rates of health-related contacts, medication use and higher socioeconomic costs. The employment and the income rates of employed COPD patients were significantly lower compared to controls. The annual net costs, including social transfers were €8,572 for COPD patients. These consequences were present up to 11 years before first time diagnosis in the secondary health care sector and became more pronounced with disease advancement.

**Conclusion:** This study provides unique national data on direct and indirect costs before and after initial diagnosis with COPD in Denmark as well as mortality, health and economic consequences for the individual and for society. It could be speculated that early identification and intervention might contribute to the solution.

## Article Summary

### Article Focus:

- To show the socioeconomic impact of COPD before and after initial diagnosis.
- To provide national data regarding health and mortality of COPD patients before and after diagnosis.
- To provide extended national data regarding direct and indirect costs of COPD.

### Key Messages:

- Patients with an initial primary or secondary diagnosis of COPD had poor survival. The average (95% CI) 12-year survival rate was 0.364 (0.364-0.368) compared with 0.686 among controls (0.682-0.690).
- COPD was associated with significantly higher rates of health-related contacts, medication use and higher socioeconomic costs. The employment rates and the income rates of employed COPD patients were significantly lower compared to controls.
- These consequences were present up to 11 years before first diagnosis in the secondary sector and became more pronounced with disease advancement.

### Strengths and limitations:

- This study truly is unique – providing for the first time ever complete and highly relevant data regarding health and direct and indirect costs of COPD of an entire nation over a time period of 12 years.
- The 12 year time-window gives a unique possibility to look backwards and forwards from the point of initial diagnosis.
- This epidemiological study is solely based on information from national databases leading to some limitations.
- The results do not reflect the impact of COPD per se as the pronounced comorbidities of COPD patients (depression, anxiety, cardiovascular disease etc.) will have an impact, too.

## Introduction

Chronic Obstructive Pulmonary Disease (COPD) is among the leading causes of morbidity and mortality worldwide, but longitudinal studies of the economic consequences of COPD are scarce (1, 2).

Smoking, though not necessarily number of pack years, is slowly declining in the Western world but continues to rise elsewhere and it is estimated that the global impact of COPD will increase in the years to come (3-5).

Estimates of COPD prevalence in industrialized countries range widely reflecting both true differences as well as differences in the definition of COPD and in the diagnostic tools used. Most studies find a 10–15% prevalence of COPD in people from 35-40 years and older (6-11). The 17.4% prevalence of COPD in Denmark reported in The Copenhagen City Heart Study is among the highest in the world (12).

The burden of COPD on the health care sector is substantial and has been described and documented in previous cost-of-illness studies concentrating on treatment of COPD and not considering comorbidity (13-20).

Furthermore, the information and assumption of costs have focused on direct costs because indirect costs have generally not been available. Thus, an estimate of total costs of COPD has not yet been achieved.

In Denmark, it is possible to calculate direct and indirect costs of any given disease because information from public and private hospitals and clinics in the primary and secondary care sectors, including medication, social factors, educational level, income and employment data from all patients is registered in central databases and be linked by the unique civil registration number assigned to all Danish citizens facilitating easy and reliable linkage of data. The aim of this study was to evaluate the direct and indirect economic burden of COPD in Denmark before and after initial diagnosis.

## Methods

In Denmark, all hospital contacts (Emergency Rooms, ambulatory visits, Admittances etc.), primary and secondary diagnoses are registered in the National Patient Registry (NPR) (21). The NPR includes administrative information, diagnoses, and diagnostic and treatment procedures using several international classification systems, including the International Statistical Classification of Diseases and Related Health Problems 10th Revision (ICD-10 Version: 2010).

1  
2  
3  
4 The NPR is a time-based national database that includes data from all inpatient and outpatient  
5 contact, so the data that we extracted are representative of all patients in Denmark who has received  
6 a first time primary and secondary diagnosis of COPD irrespective of other diagnoses. As data are  
7 available for the entire observation period, we can trace patients retrospectively and prospectively  
8 relative to the time of their diagnosis. Furthermore, all contacts in the primary sector (general  
9 practice and specialist care) and the use of medications are recorded in the databases of the National  
10 Health Security and the Danish Health and Medicines Agency, respectively.

11  
12  
13  
14  
15 Even though the study is evaluating a relatively long period of time, there is a risk of  
16 underestimating the number of patients with COPD, since those with a contact in the primary sector  
17 only but not in the secondary sector are recorded as having had contact but not as having received a  
18 diagnosis.  
19  
20  
21  
22  
23

24 We extracted the following first time primary or secondary diagnoses from the NPR in the time  
25 period 1998-2010: “J44 Other chronic obstructive pulmonary disease” comprised by the  
26 following sub-diagnoses: “J44.0 Chronic obstructive pulmonary disease with acute lower  
27 respiratory infection”, J44.1 Chronic obstructive pulmonary disease with acute exacerbation,  
28 unspecified” and “J44.9 Chronic obstructive pulmonary disease, unspecified”.  
29  
30  
31  
32 “J44.8 Other specified chronic obstructive pulmonary disease” was excluded as well as “J43  
33 Emphysema” and “J47 Bronchiectasis. Data on disease severity was not available.  
34  
35  
36

37 Using data from the Danish Civil Registration System including information about all partners,  
38 their marital status, social factors, education level, employment, incomes, pensions etc. (22), we  
39 randomly selected controls of the same age, sex and educational level as the patients.  
40  
41

42 Nor the NPR or any other of the national databases contains information about smoking status.  
43 Social compensation was performed by selecting control subjects residing in the same area of the  
44 country as the patients and with the same marital status. The ratio of control subjects to patients was  
45 1:1. Data from patients and matched control subjects who could not be identified in the Income  
46 Statistics database were excluded from the sample. More than 99% of the observations in the two  
47 groups were successfully matched. Patients and matched controls were followed from 1998 to 2010.  
48  
49  
50  
51  
52 If a patient or control was not present in the registry on 1 January each year due to death,  
53 imprisonment or immigration, the corresponding control or patient control was not included in the  
54 dataset for that year.  
55  
56  
57  
58  
59  
60

1  
2  
3  
4 Information about educational level is very robust for everyone between the ages of 14 and 80 with  
5 only little information lacking. On the other hand there is no available information about  
6 educational level for people under the age of 14 years and for a very large proportion of those aged  
7 80 years or more – the latter due to lack of registration of education in the Danish Civil Registration  
8 System database. This registration, based on information from the different teaching institutions, did  
9 not begin until 1970.  
10

11  
12  
13  
14 One could argue that a huge proportion of the unregistered persons are unskilled but we cannot tell  
15 and the problem is the same in the control group. To avoid bias, we excluded all persons with  
16 COPD where proper matching information was missing.  
17  
18  
19

20  
21 Patients and matched controls were followed through the entire time period or until death. If  
22 diagnosis of COPD of any given individual was made in the first year (1998) we were able to  
23 follow that individual 11 years forward in time. If diagnosis of COPD of any given individual was  
24 made in the last year (2010) we were able to follow that individual 11 years backwards in time. If  
25 diagnosis of COPD of any given individual was made between the first and the last year we were  
26 able to follow that individual both backwards and forward in time.  
27  
28  
29

30  
31  
32 Municipal services such as care of the elderly (home care nursing and general home care) and  
33 municipal rehabilitation is not included as they are paid by the municipals.  
34  
35

36  
37 The economic consequences of COPD were estimated by determining the annual costs per patient  
38 diagnosed with COPD and comparing these figures with the healthcare costs in a matched control  
39 group. Diagnosis of COPD is presented to the NPR using information from public and private  
40 hospitals. These diagnoses rely on clinical information and results of diagnostic procedures (e.g.  
41 spirometry, bronchoscopy). The procedures are registered but the results of the diagnostic procedure  
42 are not recorded in the NPR. The health cost was then divided into annual direct and indirect  
43 healthcare costs.  
44  
45  
46  
47

48  
49 Direct costs included the average costs of hospitalization and outpatient treatment, for separate  
50 diagnosis-related groups and specific outpatient costs. These costs were all calculated from Danish  
51 Ministry of Health data using diagnosis- related groups (DRG) and average case-mix costs of  
52 hospitals or outpatient costs updated on an annual basis. The use and costs of drugs were obtained  
53 from the Danish Health and Medicines Agency consisting of the retail price of each drug (including  
54  
55  
56  
57  
58  
59  
60

1  
2  
3  
4 dispensing costs) multiplied by the number of transactions. The frequencies and costs of  
5 consultations with general practitioners and other specialists were based on National Health  
6 Security data.  
7  
8

9  
10 Indirect costs included those related to reduced unemployment benefits and to social transfer  
11 payments. Indirect costs were based on income figures from Income Statistics. Costs were  
12 measured on an annual basis and adjusted to 2010 prices in Euros (€1: DKK 7.45).  
13  
14

15  
16 Cost-of-illness studies measure the economic burden resulting from disease and illness across a  
17 defined population and include direct and indirect costs. Direct costs are the value of resources used  
18 in the treatment, care, and rehabilitation of people with the condition under study. Indirect costs  
19 represent the value of economic resources lost because of disease-related work disability or  
20 premature mortality. As patients leave the national data registers at the time of death, the indirect  
21 costs estimate comprises only the production loss related to disease-related work disability. It is  
22 important to distinguish costs from monetary transfer payments such as disability and welfare  
23 payments. These payments represent a transfer of purchasing power to the recipients from the  
24 general taxpayers but do not represent net increases in the use of resources and, therefore, are not  
25 included in the total cost estimate.  
26  
27  
28  
29  
30  
31  
32  
33  
34  
35

### 36 Statistical analysis

37  
38 The study was approved by the Danish Data Protection Agency. Data were anonymised and neither  
39 individual consent nor ethical approval was required.  
40

41 The results are presented as means because some patients had a very high resource consumption  
42 which, despite leading to a skewed distribution, would not be adequately represented if data were  
43 presented as median values. Extreme values were manually validated and no errors were identified.  
44 Statistical analysis was performed using SAS 9.1.3 (SAS, Inc., Cary, NC). Statistical significance of  
45 the cost estimates was assessed by nonparametric bootstrap analysis (23, 24).  
46  
47

48 Survival was estimated using the Kaplan-Maier method. Hazard ratio was estimated using the Cox  
49 proportional hazard model.  
50  
51  
52  
53

### 54 **Results**

55 We identified and extracted 131,811 patients with COPD from the national databases (1998-2010)  
56 and compared with 131,811 randomly selected matched controls. The age distribution and  
57  
58  
59  
60



1  
2  
3  
4 education level of patients are shown in Table 1. There are a little more female than male COPD  
5 patients - probably because of the age distribution. As expected, most of the patients with an initial  
6 diagnosis of COPD are middle-aged or older.  
7  
8

9  
10 Figure 1 shows distribution of all the included patients with COPD (in red). In blue are the excluded  
11 patients with a diagnosis of “J44.8 Other specified chronic obstructive pulmonary disease” which  
12 primarily is younger people with a diagnosis of chronic asthmatic bronchitis.  
13  
14

15  
16  
17 Figure 2 displays survival distribution of COPD patients and controls showing a decline in survival  
18 of COPD patients compared to controls.  
19  
20

21  
22 The percentages of COPD patients and controls receiving various health care and income is shown  
23 in Table 2. COPD is associated with significantly higher rates of health-related contact (Outpatient  
24 and Inpatient treatment as well as Primary Care), use more medication, have more persons on  
25 various public transfer incomes and less people earning income from employment compared to  
26 controls.  
27  
28  
29

30  
31  
32 The annual average health costs and income of COPD patients before and after diagnosis compared  
33 with controls are displayed in Table 3. COPD is associated with significantly higher rates of health-  
34 related costs, medication use and lower income rates compared to controls both before and  
35 increasingly so after diagnosis.  
36  
37  
38

39  
40 Figure 3 shows total health expenses, income from employment and public transfer income before  
41 and after diagnosis of COPD compared with controls.  
42

43 For every year the total health expenses are significantly higher for COPD patients. A peak in  
44 expenses is seen at the time of diagnosis.  
45

46 For COPD the income from employment is significantly lower and the total public transfer income  
47 is significantly higher than for controls – even 11 years before the diagnosis has been given.  
48

49 Both effects diminish over time due to people getting older and retiring from work.  
50

51 In Figure 3 the x-axis begins at minus 11 and stops at 11 years. In year zero all cases and their  
52 controls are present. When moving backwards from zero to minus 11, every year will hold less and  
53 less cases (and controls) because the ones diagnosed with COPD in 1998 were not followed  
54  
55  
56  
57  
58  
59  
60

1  
2  
3  
4 backwards in time, the ones diagnosed with COPD in 1999 were only followed backwards 1 year in  
5 time and so on. The same is true when moving forwards from year zero to year 11 because the ones  
6 diagnosed with COPD in 2010 were not followed forward in time, the ones diagnosed with COPD  
7 in 2009 were only followed forward 1 year in time and so on.

8  
9 One should be cautious to compare one year with another in the figures, because two neighbor years  
10 will not be identical but are composed of some identical cases and some cases that differs  
11 completely.

12  
13 As an example: At year minus 11 the cases diagnosed with COPD in 2010 are shown (thus we are  
14 11 years before the time of the diagnosis). Year minus 10 hold the cases who got diagnosed in 2010  
15 plus the cases diagnosed in 2009 (thus we are 10 years before the time of the diagnosis).  
16  
17  
18  
19  
20  
21  
22

## 23 Discussion

24 To our knowledge, this is the first epidemiological COPD study evaluates the direct and indirect  
25 costs of COPD at a national level.  
26

27 The 12 year time-window gives a unique possibility to look backwards and forwards from the point  
28 of initial diagnosis. Including every person at a national level with a first time diagnosis of COPD  
29 and randomly selected controls matched for age, gender, educational level, residence and marital  
30 status provides a very large amount of persons and data making the direct and indirect results more  
31 complete and robust.  
32  
33  
34  
35  
36  
37

38 The study has provided several information of interest and confirms the following general beliefs  
39 about COPD:

40 Patients with an initial primary or secondary diagnosis of COPD had poor survival. The average  
41 (95% CI) 12-year survival rate was 0.364 (0.364-0.368) compared with 0.686 among controls  
42 (0.682-0.690).  
43  
44  
45

46 COPD was associated with significantly higher rates of health-related contacts, medication use and  
47 higher socioeconomic costs. The employment rates and the income rates of employed COPD  
48 patients were significantly lower compared to controls.  
49

50 The annual net costs after initial diagnosis, including social transfers were €8,572 for COPD  
51 patients.  
52

53 These consequences were present up to 11 years before first diagnosis in the secondary sector and  
54 became more pronounced with disease advancement.  
55  
56  
57  
58  
59  
60

1  
2  
3  
4  
5  
6 Determining the economic consequences of COPD is complex. With an accurate diagnosis and  
7 appropriate treatment patients' risk of exacerbation decreases as well as the associated costs and  
8 maybe even death (although still controversial). In addition quality of life improves. On the other  
9 hand the diagnostic procedures, treatment and management of COPD add to the direct costs.  
10  
11 However, even when we include the costs associated with the diagnosis and treatment of COPD,  
12 our study showed that patients with COPD incur a significant economic burden because the lower  
13 employment rates and the lower income rates of employed COPD patients exceed the direct costs of  
14 the disease. These factors influence costs and should be included in the disease burden.  
15  
16  
17  
18  
19

20  
21 This epidemiological study is solely based on information from national databases leading to some  
22 limitations.  
23

24 The results do not reflect the impact of COPD per se as the pronounced comorbidities of COPD  
25 patients (depression, anxiety, cardiovascular disease etc.) will have an impact, too. By adjusting for  
26 the above mentioned available match factor, including educational level, we have tried to minimize  
27 this effect. Especially educational level is a good parameter to use if one wants to level out  
28 economical differences. However social factors that we are not aware of can have an impact on the  
29 outcome and explain some of the observed differences.  
30  
31

32 Ideally, we would have adjusted for smoking status but this information is not registered in any of  
33 the national databases in Denmark.  
34  
35  
36

37 In Denmark ICD-10 classification is only used in the secondary health sector (hospitals) not in the  
38 primary health sector (general practitioners). Even though this study spans 12 years and includes all  
39 with an initial primary or secondary ICD-10 diagnosis of COPD - and the majority of known COPD  
40 patients are believed to be included over time - there is a risk of underestimation. COPD patients  
41 that are only followed in the primary health care sector during the study period are not included and  
42 this will bias the results as these patients will tend to be less sick. This fact will tend to overestimate  
43 the direct and indirect costs of COPD.  
44  
45  
46  
47  
48  
49

50 The accuracy of the diagnosis and management is sensitive to the diagnostic criteria used by the  
51 reporting doctors. The people aged below 30-40 years with a diagnosis of COPD may – at least to  
52 some extent - be due to misclassification.  
53  
54

55 Furthermore, although J44 by far is the most common diagnosis used in COPD, several different  
56  
57  
58  
59  
60

1  
2  
3  
4 diagnoses deriving from J40 (bronchitis), J41 (simple and mucopurulent chronic bronchitis), J43  
5 (emphysema) and J47 bronchiectasis) are also used to some (unknown) extent. We have chosen to  
6 exclude these diagnoses as well as J44.8 Other specified chronic obstructive pulmonary disease. It  
7 could be argued that a large proportion of these excluded individuals are very likely to have COPD,  
8 but because this is an epidemiologic study, entirely based on registry data, we decided to include  
9 only those with a specific diagnosis of COPD.  
10  
11

12  
13  
14 By allowing both primary and secondary diagnosis of COPD some correction of this problem has  
15 taken place but may have opened up for adding further comorbidity.  
16

17 In the control group there will be a number of undiagnosed patients with COPD (approx. 10%) thus  
18 introducing a bias tending to reduce the difference in costs between the two groups in our study  
19 (25).  
20  
21  
22  
23

24 **Conclusion:** This study provides unique data at a national level regarding direct and indirect costs  
25 before and after initially diagnosed COPD as well as serious mortality, health and economic  
26 consequences for the individual patient and for society.  
27  
28

29 As the economic consequences are present years prior to the first primary or secondary diagnosis of  
30 COPD in the secondary health sector one, it could be speculated that early identification and  
31 intervention might be part of the solution.  
32  
33

34 Adequate treatment may reduce the consequences of COPD but, if socially and economically  
35 significant reductions in morbidity, mortality and social impact are to be achieved, much earlier  
36 disease identification and management are needed More research and evaluation of case finding  
37 strategies and disease management programs are needed (26).  
38  
39  
40  
41  
42  
43  
44  
45  
46  
47  
48  
49  
50  
51  
52  
53  
54  
55  
56  
57  
58  
59  
60

**Conflicts of interest:**

None of the authors have any conflicts of interest, nor do they have any financial disclosures to make.

**Funding:**

This study was supported by an unrestricted grant from the Respiroics Foundation and from a grant from Center for Healthy Aging, Faculty of Health Sciences, University of Copenhagen. The study is a part of a larger study supported by the Center of Healthy Aging, Faculty of Health Sciences, University of Copenhagen, with the purpose of identifying the burden of chronic diseases. None of the funders had any influence on the study design, the collection, analysis and interpretation of the data, the writing of the report, or the decision to submit the paper for publication.

**Competing interests:** None.

**Ethics approval:**

The study was approved by the Danish Data Protection Agency. Because data handling was anonymous, individual and ethical approval was not mandatory.

**Provenance and peer review:**

Not commissioned; externally peer reviewed.

**Author Contribution:**

Anders Løkke: Planning, Statistics, Writing and Discussion.

Ole Hilberg: Planning, Writing and Discussion.

Philip Tønnesen: Writing and Discussion.

Jakob Kjellberg: Planning, Statistics and Writing.

Rikke Ibsen: Statistics and Writing.

Poul Jennum: Planning, Writing and Discussion.

## References

1. <http://www.who.int/en/> visited 18.04.2013.
2. Løkke A, Lange P, Scharling H, et al. Developing COPD a 25 year follow up study of the general population. *Thorax* 2006; **61**: 935-39.
3. Decramer M, Janssens W, Miravittles M. Chronic obstructive pulmonary disease. *Lancet* 2012; **379**: 1341-51.
4. <http://www.goldcopd.org> visited 18.04.2013.
5. Murray CJ, Lopez AD. Alternative projections of mortality and disability by cause 1990-2020: Global Burden of Disease Study. *Lancet* 1997; **349**: 1498-1504.
6. Buist AS, Mcburnie MA, Vollmer WM et al. International variation in the prevalence of COPD (The BOLD Study): a population-based prevalence study. *Lancet* 2007; **370**: 741-50.
7. Lindberg A, Jonsson AC, Rönmark E, et al. Prevalence of chronic obstructive pulmonary disease according to BTS, ERS, GOLD and ATS criteria in relation to doctors' diagnosis, symptoms, age, gender and smoking habits. *Respiration*. 2005; **72**: 471-9.
8. Menezes MB, Perez-Padilla R, Jardim JRB, et al. Chronic obstructive pulmonary disease in five Latin American cities (the Platino study): a prevalence study. *Lancet* 2005; **366**: 1875-81.
9. Kim DS, Kim YS, Jung KS, et al. Prevalence of chronic obstructive pulmonary disease in Korea: a population-based spirometry survey. *Am J Respir Crit Care Med*. 2005; **172**: 842-7.
10. Menezes AM, Victora CG, Rigatto M. Prevalence and risk factors for chronic bronchitis in Pelotas, RS, Brazil: a population-based study. *Thorax*. 1994; **49**: 1217-21.
11. Fukuchi Y, Nishimura M, Ichinose M, et al. COPD in Japan: the Nippon COPD Epidemiology study. *Respirology*. 2004 Nov; **9** (4): 458-65.
12. Løkke A, Fabricius PG, Vestbo J, et al. Prevalence of chronic obstructive pulmonary disease in Copenhagen. Results from The Copenhagen City Heart Study. *Ugeskr Laeger*. 2007 Nov 12; **169** (46): 3956-60.
13. Detournay B, Pribil D, Fournier M, et al. The SCOPE Study: health-care consumption related to patients with chronic obstructive pulmonary disease in France. *Value Health*. 2004; **7**: 168-74.
14. Dahl R, Lofdahl CG, editors. The economic impact of COPD in North America and Europe. Analysis of the confronting COPD survey. *Respir Med*. 2003; **97**(Suppl. C).

15. Wouters EFM. Economic analysis of the confronting COPD survey: an overview of the results. *Respir Med.* 2003; **97**(Suppl. C): S3–S14.
16. Grasso ME, Weller WE, Shaffer TJ, et al. Capitation, managed care and chronic obstructive pulmonary disease. *Am J Respir Crit Care Med.* 1998; **158**: 133–8.
17. Dal Negro RW, Tognella S, Tosatto R, et al. Costs of chronic obstructive pulmonary disease (COPD) in Italy: The SIRIO study (Social Impact of Respiratory Integrated Outcomes). *Respir Med.* 2008; **102**: 92–101.
18. Menn P, Heinrich J, Huber RM, et al. for the KORA Study Group. Direct medical costs of COPD - An excess cost approach based on two population-based studies. *Respir Med.* 2012; **106**: 540-8. Epub 2011 Nov 18.
19. Blanchette CM, Roberts MH, Petersen H, et al. Economic burden of chronic bronchitis in the United States: a retrospective case-control study. *International Journal of COPD.* 2011; **6**: 73–81.
20. Bilde L, Rud SA, Dollerup J, et al. The cost of treating patients with COPD in Denmark--a population study of COPD patients compared with non-COPD controls. *Respir Med.* 2007; **101**: 539-46. Epub 2006 Aug 4.
21. Lynge E, Sandegaard JL, Rebolj M. The Danish National patient Register (in Danish). *Scand J Public Health* 2011; **39**: 30-3.
22. Pedersen CB. The Danish Civil Registration System (in Danish). *Scand J Public Health* 2011; **39**: 22-5.
23. Agresti A. Categorical Data Analysis. 2<sup>nd</sup> ed. New York: Wiley; 2002.
24. Efron B, Tibshirani RJ. An Introduction to the Bootstrap. London: Chapman & Hall, 1993. 2008.
25. Shahab L, Jarvis MJ, Britton J, et al. Prevalence, diagnosis and relation to tobacco dependence of chronic obstructive pulmonary disease in a nationally representative population sample. *Thorax.* 2006; **61**:1043-7. Epub 2006 Oct 13.
26. Løkke A, Ulrik CS, Dahl R, et al. Detection of previously undiagnosed cases of COPD in a high-risk population identified in general practice. *COPD.* 2012; **9**: 458-65. Epub 2012 May 29.

**Table 1:** Age, gender and education level distribution of COPD patients.

| Gender                  | N              | Percentage |
|-------------------------|----------------|------------|
| Male                    | 63,342         | 48.1       |
| Female                  | 68,469         | 51.9       |
| Married or co-habiting  |                | 54.0       |
| <b>Age distribution</b> |                |            |
| <14                     | -              | -          |
| 14-20                   | 136            | 0.1        |
| 20-29                   | 394            | 0.3        |
| 30-39                   | 1,717          | 1.3        |
| 40-49                   | 6,664          | 5.1        |
| 50-59                   | 19,601         | 14.9       |
| 60-69                   | 38,297         | 29.1       |
| 70-79                   | 51,524         | 39.1       |
| 80-92                   | 13,478         | 10.2       |
| ≥92                     | -              | -          |
| <b>Education level</b>  |                |            |
| Primary                 | 80,483         | 61.1       |
| Secondary               | 864            | 0.7        |
| Vocational              | 40,050         | 30.4       |
| Short college           | 1,824          | 1.4        |
| Medium college          | 6,784          | 5.1        |
| Master/PhD              | 1,806          | 1.4        |
| Total                   | <b>131,811</b> | 100.0      |



**Figure 1:** Distribution of included (red) and excluded cases (blue) on the basis of diagnosis according to age (x-axis) and number (y-axis).

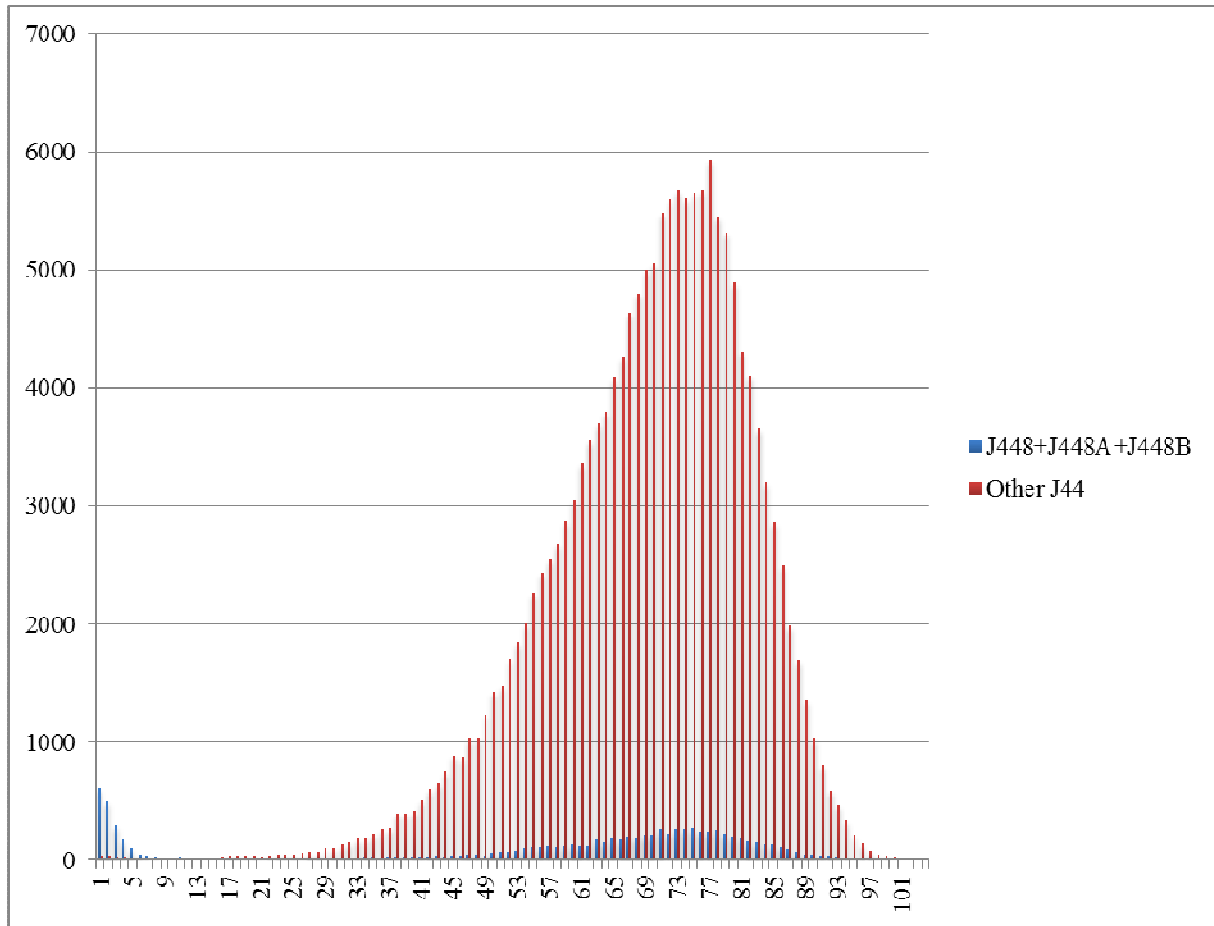

**Figure 2:** Kaplan-Maier survival distribution of COPD patients (blue) and controls (red) estimated using Cox proportional hazard model.

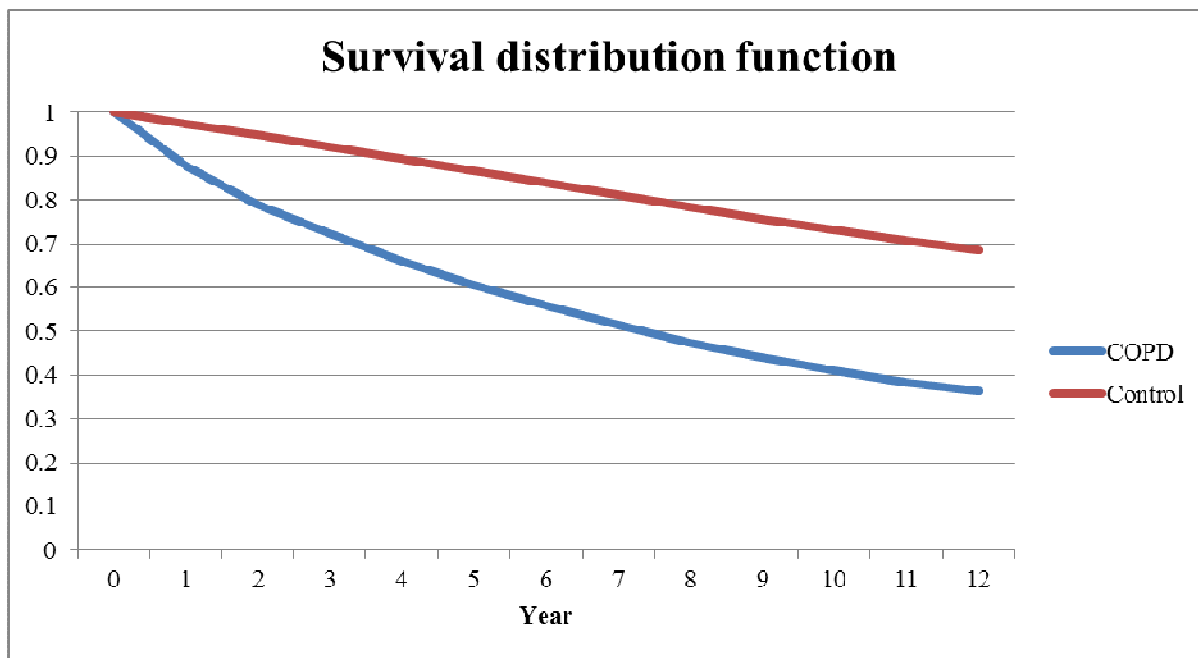

|                        | COPD        |                                         |                                   | Control                           |                                         |                                   |                                   |
|------------------------|-------------|-----------------------------------------|-----------------------------------|-----------------------------------|-----------------------------------------|-----------------------------------|-----------------------------------|
| <b>Survival</b>        |             |                                         |                                   |                                   |                                         |                                   |                                   |
|                        | Year        | Survival Distribution Function Estimate | SDF Upper 95.00% Confidence Limit | SDF Lower 95.00% Confidence Limit | Survival Distribution Function Estimate | SDF Upper 95.00% Confidence Limit | SDF Lower 95.00% Confidence Limit |
|                        | 0           | 1,000                                   | 1,000                             | 1,000                             | 1,000                                   | 1,000                             | 1,000                             |
|                        | 1           | 0,876                                   | 0,878                             | 0,875                             | 0,973                                   | 0,974                             | 0,972                             |
|                        | 2           | 0,790                                   | 0,792                             | 0,788                             | 0,948                                   | 0,949                             | 0,946                             |
|                        | 3           | 0,722                                   | 0,725                             | 0,720                             | 0,921                                   | 0,922                             | 0,919                             |
|                        | 4           | 0,661                                   | 0,664                             | 0,659                             | 0,894                                   | 0,895                             | 0,892                             |
|                        | 5           | 0,606                                   | 0,609                             | 0,603                             | 0,866                                   | 0,867                             | 0,864                             |
|                        | 6           | 0,557                                   | 0,560                             | 0,554                             | 0,838                                   | 0,840                             | 0,836                             |
|                        | 7           | 0,515                                   | 0,518                             | 0,512                             | 0,811                                   | 0,813                             | 0,808                             |
|                        | 8           | 0,475                                   | 0,478                             | 0,472                             | 0,784                                   | 0,786                             | 0,781                             |
|                        | 9           | 0,441                                   | 0,444                             | 0,437                             | 0,757                                   | 0,760                             | 0,754                             |
|                        | 10          | 0,410                                   | 0,414                             | 0,407                             | 0,731                                   | 0,734                             | 0,728                             |
|                        | 11          | 0,383                                   | 0,387                             | 0,379                             | 0,706                                   | 0,710                             | 0,703                             |
|                        | 12          | 0,364                                   | 0,368                             | 0,360                             | 0,686                                   | 0,690                             | 0,682                             |
| <b>Censored</b>        | N           | 131,811                                 |                                   |                                   | 131,811                                 |                                   |                                   |
|                        | % censored  | 53.5                                    |                                   |                                   | 80.2                                    |                                   |                                   |
| <b>Hazard function</b> | HazardRatio | 0,33                                    |                                   |                                   |                                         |                                   |                                   |
|                        | ProbChiSq   | 0,00                                    |                                   |                                   |                                         |                                   |                                   |
|                        | StdErr      | 0,01                                    |                                   |                                   |                                         |                                   |                                   |

**Table 2:** Percentages of COPD patients and controls that receive income and various health care services (after diagnosis).

|                                     |   | COPD | Controls | P-value |
|-------------------------------------|---|------|----------|---------|
| <b>Outpatient treatment</b>         | % | 64.9 | 36.2     | <0.01   |
| <b>Inpatient treatment</b>          | % | 53.8 | 18.8     | <0.01   |
| <b>Medication</b>                   | % | 98.1 | 85.9     | <0.01   |
| <b>Public health insurance</b>      | % | 99.0 | 95.6     | <0.01   |
| <b>Income from employment</b>       | % | 16.7 | 23.8     | <0.01   |
| <b>Public transfer income total</b> | % | 90.3 | 83.8     | <0.01   |
| <i>Pension</i>                      | % | 60.3 | 63.8     | <0.01   |
| <i>Other public transfers</i>       | % | 27.6 | 18.6     | <0.01   |
| <i>Sickpay (publicly funded)</i>    | % | 5.5  | 3.6      | <0.01   |

(Bootstrapped Cochran-Armitage test showing whether the fraction received is significant for each expense type). The values given are in percentages.

**Table 3:** Health costs and income of COPD patients before and after diagnosis compared with controls.

|                  |                                   |   | COPD          | Controls     | P-value |
|------------------|-----------------------------------|---|---------------|--------------|---------|
| Before diagnosis | N                                 |   | 708,329       | 708,343      |         |
|                  | Outpatient treatment              | € | 335           | 227          | <0.01   |
|                  | Inpatient treatment               | € | 1,534         | 904          | <0.01   |
|                  | Medication                        | € | 918           | 434          | <0.01   |
|                  | Public health insurance           | € | 357           | 278          | <0.01   |
|                  | Income from employment            | € | 7,947         | 11,418       | <0.01   |
|                  | Public transfer income total      | € | 12,858        | 11,167       |         |
|                  | Pension                           | € | 7,029         | 6,824        | <0.01   |
|                  | Other public transfers            | € | 5,450         | 4,104        | <0.01   |
|                  | Sickpay (public funded)           | € | 378           | 238          | <0.01   |
|                  | Direct health costs               | € | 3,144         | 1,843        |         |
|                  | Indirect costs, foregone earnings | € | 3,471         |              |         |
|                  | Sum of direct and indirect costs  | € | <b>6,616</b>  | <b>1,843</b> |         |
|                  | Net costs                         | € | 4,773         |              |         |
|                  | Social transfer payments          | € | 12,858        | 11,167       |         |
|                  | Net costs including transfers     | € | <b>6,464</b>  |              |         |
| After diagnosis  | N                                 | N | 597,235       | 776,674      |         |
|                  | Outpatient treatment              | € | 789           | 429          | <0.01   |
|                  | Inpatient treatment               | € | 5,563         | 1,736        | <0.01   |
|                  | Medication                        | € | 1,782         | 610          | <0.01   |
|                  | Public health insurance           | € | 515           | 361          | <0.01   |
|                  | Income from employment            | € | 4,509         | 6,800        | <0.01   |
|                  | Public transfer income total      | € | 13,888        | 13,122       |         |
|                  | Pension                           | € | 9,171         | 10,317       | <0.01   |
|                  | Other public transfers            | € | 4,361         | 2,634        | <0.01   |
|                  | Sickpay (publicly funded)         | € | 356           | 171          | <0.01   |
|                  | Direct health costs               | € | 8,650         | 3,135        |         |
|                  | Indirect costs, foregone earnings | € | 2,291         |              |         |
|                  | Sum of direct and indirect costs  | € | <b>10,941</b> | <b>3,135</b> |         |
|                  | Net costs                         | € | 7,806         |              |         |
|                  | Social transfer payments          | € | 13,888        | 13,122       |         |
|                  | Net costs including transfers     | € | <b>8,572</b>  |              |         |

(Yearly costs calculated as the average costs with respect to income per year. N = summarized number of individuals × years observed. P-value from bootstrapped t-test. The values given are in Euros).

**Figure 3:** Total health expenses, income from employment and public transfer income in Euros before and after diagnosis of COPD (green) compared with control subjects (blue).

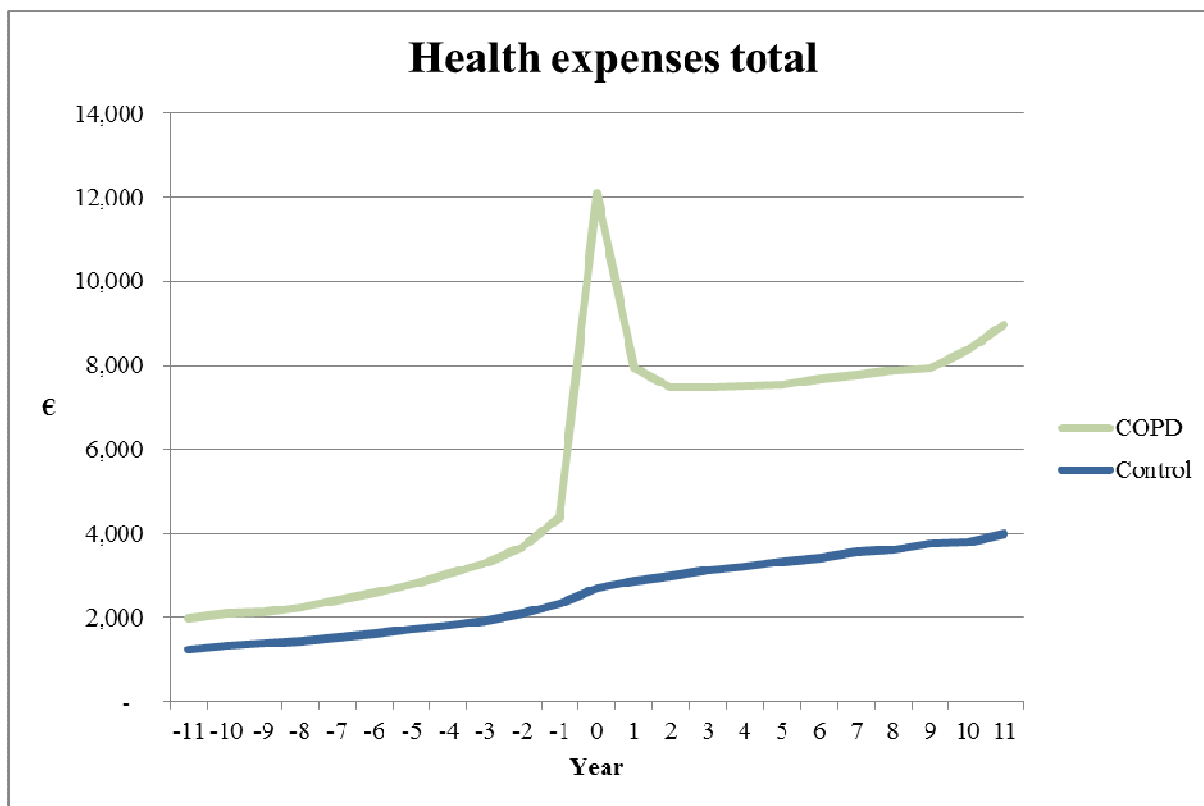

only

1  
2  
3  
4  
5  
6  
7  
8  
9  
10  
11  
12  
13  
14  
15  
16  
17  
18  
19  
20  
21  
22  
23  
24  
25  
26  
27  
28  
29  
30  
31  
32  
33  
34  
35  
36  
37  
38  
39  
40  
41  
42  
43  
44  
45  
46  
47  
48  
49  
50  
51  
52  
53  
54  
55  
56  
57  
58  
59  
60

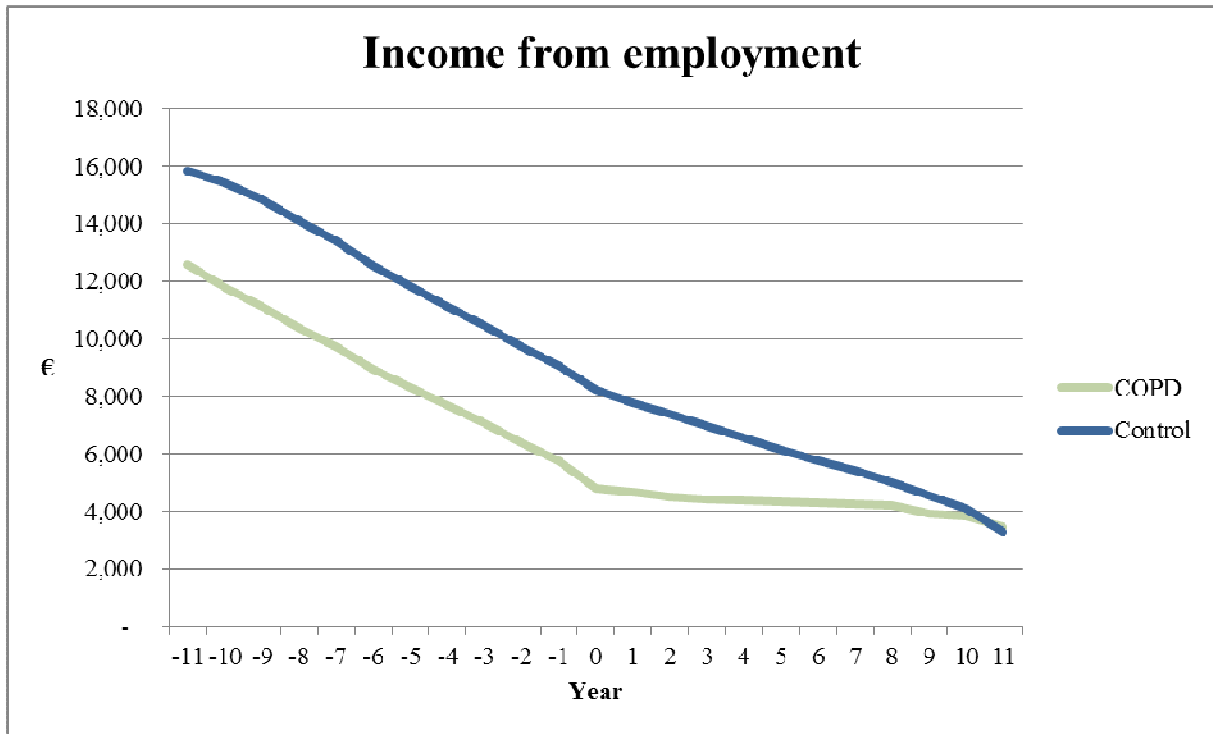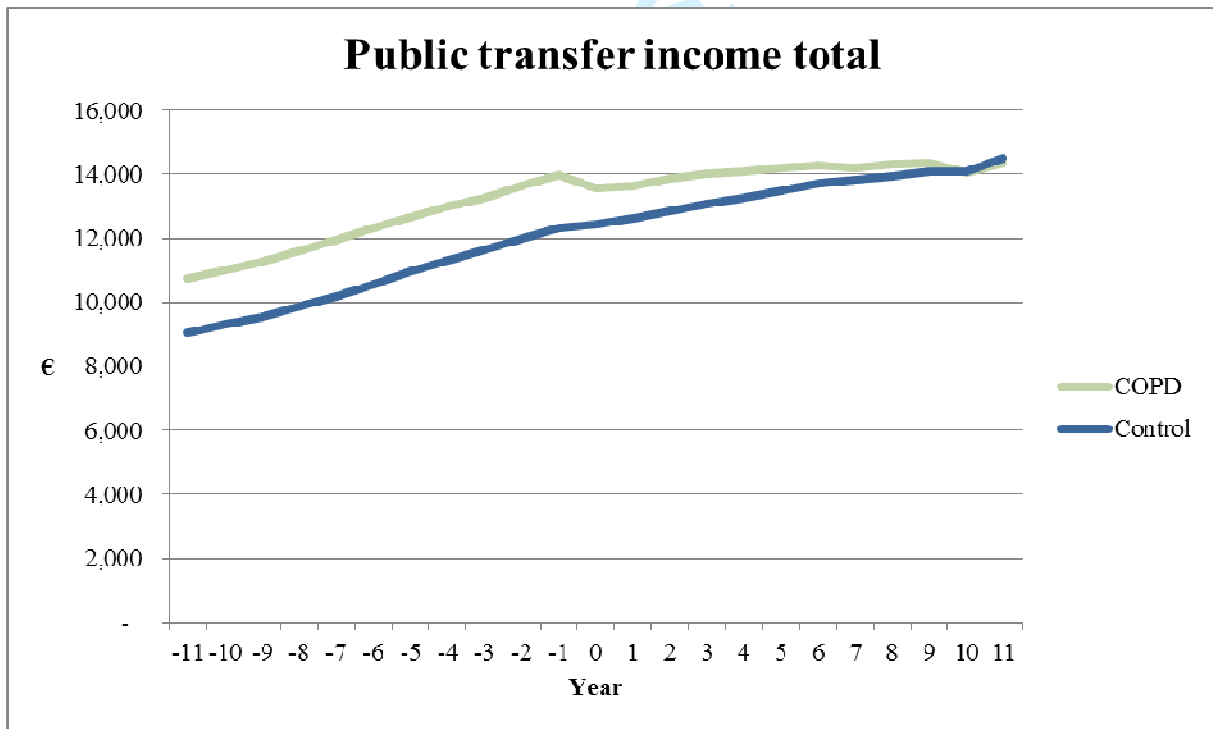

## Introduction

Chronic Obstructive Pulmonary Disease (COPD) is among the leading causes of morbidity and mortality worldwide, but longitudinal studies of the economic consequences of COPD are scarce (1, 2).

Smoking, though not necessarily number of pack years, is slowly declining in the Western world but continues to rise elsewhere and it is estimated that the global impact of COPD will increase in the years to come (3-5).

Estimates of COPD prevalence in industrialized countries range widely reflecting both true differences as well as differences in the definition of COPD and in the diagnostic tools used. Most studies find a 10–15% prevalence of COPD in people from 35-40 years and older (6-11). The 17.4% prevalence of COPD in Denmark reported in The Copenhagen City Heart Study is among the highest in the world (12).

The burden of COPD on the health care sector is substantial and has been described and documented in previous cost-of-illness studies concentrating on treatment of COPD and not considering comorbidity (13-20).

Furthermore, the information and assumption of costs have focused on direct costs because indirect costs have generally not been available. Thus, an estimate of total costs of COPD has not yet been achieved.

In Denmark, it is possible to calculate direct and indirect costs of any given disease because information from public and private hospitals and clinics in the primary and secondary care sectors, including medication, social factors, educational level, income and employment data from all patients is registered in central databases and be linked by the unique civil registration number assigned to all Danish citizens facilitating easy and reliable linkage of data. The aim of this study was to evaluate the direct and indirect economic burden of COPD in Denmark before and after initial diagnosis.

## Methods

In Denmark, all hospital contacts (Emergency Rooms, ambulatory visits, Admittances etc.), primary and secondary diagnoses are registered in the National Patient Registry (NPR) (21). The NPR includes administrative information, diagnoses, and diagnostic and treatment procedures using several international classification systems, including the International Statistical Classification of Diseases and Related Health Problems 10th Revision (ICD-10 Version: 2010).

1  
2  
3  
4  
5  
6  
7  
8 The NPR is a time-based national database that includes data from all inpatient and outpatient  
9 contact, so the data that we extracted are representative of all patients in Denmark who has received  
10 a first time primary and secondary diagnosis of COPD irrespective of other diagnoses. As data are  
11 available for the entire observation period, we can trace patients retrospectively and prospectively  
12 relative to the time of their diagnosis. Furthermore, all contacts in the primary sector (general  
13 practice and specialist care) and the use of medications are recorded in the databases of the National  
14 Health Security and the Danish Health and Medicines Agency, respectively.  
15  
16 Even though the study is evaluating a relatively long period of time, there is a risk of  
17 underestimating the number of patients with COPD, since those with a contact in the primary sector  
18 only but not in the secondary sector are recorded as having had contact but not as having received a  
19 diagnosis.  
20  
21  
22  
23  
24

25 We extracted the following first time primary or secondary diagnoses from the NPR in the time  
26 period 1998-2010: "J44 Other chronic obstructive pulmonary disease" comprised by the  
27 following sub-diagnoses: "J44.0 Chronic obstructive pulmonary disease with acute lower  
28 respiratory infection", J44.1 Chronic obstructive pulmonary disease with acute exacerbation,  
29 unspecified" and "J44.9 Chronic obstructive pulmonary disease, unspecified".  
30  
31 "J44.8 Other specified chronic obstructive pulmonary disease" was excluded as well as "J43  
32 Emphysema" and "J47 Bronchiectasis. Data on disease severity was not available.  
33  
34  
35

36 Using data from the Danish Civil Registration System including information about all partners,  
37 their marital status, social factors, education level, employment, incomes, pensions etc. (22), we  
38 randomly selected controls of the same age, sex and educational level as the patients.  
39

40 Nor the NPR or any other of the national databases contains information about smoking status.  
41  
42 Social compensation was performed by selecting control subjects residing in the same area of the  
43 country as the patients and with the same marital status. The ratio of control subjects to patients was  
44 1:1. Data from patients and matched control subjects who could not be identified in the Income  
45 Statistics database were excluded from the sample. More than 99% of the observations in the two  
46 groups were successfully matched. Patients and matched controls were followed from 1998 to 2010.  
47  
48 If a patient or control was not present in the registry on 1 January each year due to death,  
49 imprisonment or immigration, the corresponding control or patient control was not included in the  
50 dataset for that year.  
51  
52  
53  
54  
55  
56  
57  
58  
59  
60



1  
2  
3  
4  
5  
6  
7  
8 Information about educational level is very robust for everyone between the ages of 14 and 80 with  
9 only little information lacking. On the other hand there is no available information about  
10 educational level for people under the age of 14 years and for a very large proportion of those aged  
11 80 years or more – the latter due to lack of registration of education in the Danish Civil Registration  
12 System database. This registration, based on information from the different teaching institutions, did  
13 not begin until 1970.

14  
15  
16 One could argue that a huge proportion of the unregistered persons are unskilled but we cannot tell  
17 and the problem is the same in the control group. To avoid bias, we excluded all persons with  
18 COPD where proper matching information was missing.  
19  
20

21  
22 Patients and matched controls were followed through the entire time period or until death. If  
23 diagnosis of COPD of any given individual was made in the first year (1998) we were able to  
24 follow that individual 11 years forward in time. If diagnosis of COPD of any given individual was  
25 made in the last year (2010) we were able to follow that individual 11 years backwards in time. If  
26 diagnosis of COPD of any given individual was made between the first and the last year we were  
27 able to follow that individual both backwards and forward in time.  
28  
29  
30

31  
32 Municipal services such as care of the elderly (home care nursing and general home care) and  
33 municipal rehabilitation is not included as they are paid by the municipalities.  
34  
35

36 The economic consequences of COPD were estimated by determining the annual costs per patient  
37 diagnosed with COPD and comparing these figures with the healthcare costs in a matched control  
38 group. Diagnosis of COPD is presented to the NPR using information from public and private  
39 hospitals. These diagnoses rely on clinical information and results of diagnostic procedures (e.g.  
40 spirometry, bronchoscopy). The procedures are registered but the results of the diagnostic procedure  
41 are not recorded in the NPR. The health cost was then divided into annual direct and indirect  
42 healthcare costs.  
43  
44  
45

46 Direct costs included the average costs of hospitalization and outpatient treatment, for separate  
47 diagnosis-related groups and specific outpatient costs. These costs were all calculated from Danish  
48 Ministry of Health data using diagnosis- related groups (DRG) and average case-mix costs of  
49 hospitals or outpatient costs updated on an annual basis. The use and costs of drugs were obtained  
50 from the Danish Health and Medicines Agency consisting of the retail price of each drug (including  
51  
52  
53  
54

1  
2  
3  
4  
5  
6  
7  
8 dispensing costs) multiplied by the number of transactions. The frequencies and costs of  
9 consultations with general practitioners and other specialists were based on National Health  
10 Security data.  
11

12  
13 Indirect costs included those related to reduced unemployment benefits and to social transfer  
14 payments. Indirect costs were based on income figures from Income Statistics. Costs were  
15 measured on an annual basis and adjusted to 2010 prices in Euros (€1: DKK 7.45).  
16

17  
18 Cost-of-illness studies measure the economic burden resulting from disease and illness across a  
19 defined population and include direct and indirect costs. Direct costs are the value of resources used  
20 in the treatment, care, and rehabilitation of people with the condition under study. Indirect costs  
21 represent the value of economic resources lost because of disease-related work disability or  
22 premature mortality. As patients leave the national data registers at the time of death, the indirect  
23 costs estimate comprises only the production loss related to disease-related work disability. It is  
24 important to distinguish costs from monetary transfer payments such as disability and welfare  
25 payments. These payments represent a transfer of purchasing power to the recipients from the  
26 general taxpayers but do not represent net increases in the use of resources and, therefore, are not  
27 included in the total cost estimate.  
28  
29  
30  
31  
32

### 33 34 35 Statistical analysis

36  
37 The study was approved by the Danish Data Protection Agency. Data were anonymised and neither  
38 individual consent nor ethical approval was required.

39  
40 The results are presented as means because some patients had a very high resource consumption  
41 which, despite leading to a skewed distribution, would not be adequately represented if data were  
42 presented as median values. Extreme values were manually validated and no errors were identified.  
43  
44 Statistical analysis was performed using SAS 9.1.3 (SAS, Inc., Cary, NC). Statistical significance of  
45 the cost estimates was assessed by nonparametric bootstrap analysis (23, 24).  
46

47 Survival was estimated using the Kaplan-Maier method. Hazard ratio was estimated using the Cox  
48 proportional hazard model.  
49

### 50 **Results**

51 We identified and extracted 131,811 patients with COPD from the national databases (1998-2010)  
52 and compared with 131,811 randomly selected matched controls. The age distribution and  
53  
54

1  
2  
3  
4  
5  
6  
7  
8 education level of patients are shown in Table 1. There are a little more female than male COPD  
9 patients - probably because of the age distribution. As expected, most of the patients with an initial  
10 diagnosis of COPD are middle-aged or older.  
11

12  
13 Figure 1 shows distribution of all the included patients with COPD (in red). In blue are the excluded  
14 patients with a diagnosis of “J44.8 Other specified chronic obstructive pulmonary disease” which  
15 primarily is younger people with a diagnosis of chronic asthmatic bronchitis.  
16  
17

18  
19 Figure 2 displays survival distribution of COPD patients and controls showing a decline in survival  
20 of COPD patients compared to controls.  
21  
22

23  
24 The percentages of COPD patients and controls receiving various health care and income is shown  
25 in Table 2. COPD is associated with significantly higher rates of health-related contact (Outpatient  
26 and Inpatient treatment as well as Primary Care), use more medication, have more persons on  
27 various public transfer incomes and less people earning income from employment compared to  
28 controls.  
29  
30

31  
32 The annual average health costs and income of COPD patients before and after diagnosis compared  
33 with controls are displayed in Table 3. COPD is associated with significantly higher rates of health-  
34 related costs, medication use and lower income rates compared to controls both before and  
35 increasingly so after diagnosis.  
36  
37

38  
39 Figure 3 shows total health expenses, income from employment and public transfer income before  
40 and after diagnosis of COPD compared with controls.  
41

42 For every year the total health expenses are significantly higher for COPD patients. A peak in  
43 expenses is seen at the time of diagnosis.  
44

45 For COPD the income from employment is significantly lower and the total public transfer income  
46 is significantly higher than for controls – even 11 years before the diagnosis has been given.  
47

48 Both effects diminish over time due to people getting older and retiring from work.

49 In Figure 3 the x-axis begins at minus 11 and stops at 11 years. In year zero all cases and their  
50 controls are present. When moving backwards from zero to minus 11, every year will hold less and  
51 less cases (and controls) because the ones diagnosed with COPD in 1998 were not followed  
52  
53  
54

1  
2  
3  
4  
5  
6  
7  
8 backwards in time, the ones diagnosed with COPD in 1999 were only followed backwards 1 year in  
9 time and so on. The same is true when moving forwards from year zero to year 11 because the ones  
10 diagnosed with COPD in 2010 were not followed forward in time, the ones diagnosed with COPD  
11 in 2009 were only followed forward 1 year in time and so on.

12  
13 One should be cautious to compare one year with another in the figures, because two neighbor years  
14 will not be identical but are composed of some identical cases and some cases that differs  
15 completely.

16  
17 As an example: At year minus 11 the cases diagnosed with COPD in 2010 are shown (thus we are  
18 11 years before the time of the diagnosis). Year minus 10 hold the cases who got diagnosed in 2010  
19 plus the cases diagnosed in 2009 (thus we are 10 years before the time of the diagnosis).  
20  
21  
22

## 23 24 **Discussion**

25  
26 To our knowledge, this is the first epidemiological COPD study evaluates the direct and indirect  
27 costs of COPD at a national level.

28  
29 The 12 year time-window gives a unique possibility to look backwards and forwards from the point  
30 of initial diagnosis. Including every person at a national level with a first time diagnosis of COPD  
31 and randomly selected controls matched for age, gender, educational level, residence and marital  
32 status provides a very large amount of persons and data making the direct and indirect results more  
33 complete and robust.  
34  
35

36  
37 The study has provided several information of interest and confirms the following general beliefs  
38 about COPD:

39  
40 Patients with an initial primary or secondary diagnosis of COPD had poor survival. The average  
41 (95% CI) 12-year survival rate was 0.364 (0.364-0.368) compared with 0.686 among controls  
42 (0.682-0.690).

43  
44 COPD was associated with significantly higher rates of health-related contacts, medication use and  
45 higher socioeconomic costs. The employment rates and the income rates of employed COPD  
46 patients were significantly lower compared to controls.

47  
48 The annual net costs after initial diagnosis, including social transfers were €8,572 for COPD  
49 patients.  
50

51 These consequences were present up to 11 years before first diagnosis in the secondary sector and  
52 became more pronounced with disease advancement.  
53  
54  
55

1  
2  
3  
4  
5  
6  
7  
8  
9  
10  
11  
12  
13  
14  
15  
16  
17  
18  
19  
20  
21  
22  
23  
24  
25  
26  
27  
28  
29  
30  
31  
32  
33  
34  
35  
36  
37  
38  
39  
40  
41  
42  
43  
44  
45  
46  
47  
48  
49  
50  
51  
52  
53  
54  
55  
56  
57  
58  
59  
60

Determining the economic consequences of COPD is complex. With an accurate diagnosis and appropriate treatment patients' risk of exacerbation decreases as well as the associated costs and maybe even death (although still controversial). In addition quality of life improves. On the other hand the diagnostic procedures, treatment and management of COPD add to the direct costs. However, even when we include the costs associated with the diagnosis and treatment of COPD, our study showed that patients with COPD incur a significant economic burden because the lower employment rates and the lower income rates of employed COPD patients exceed the direct costs of the disease. These factors influence costs and should be included in the disease burden.

This epidemiological study is solely based on information from national databases leading to some limitations.

The results do not reflect the impact of COPD per se as the pronounced comorbidities of COPD patients (depression, anxiety, cardiovascular disease etc.) will have an impact, too. By adjusting for the above mentioned available match factor, including educational level, we have tried to minimize this effect. Especially educational level is a good parameter to use if one wants to level out economical differences. However social factors that we are not aware of can have an impact on the outcome and explain some of the observed differences.

Ideally, we would have adjusted for smoking status but this information is not registered in any of the national databases in Denmark.

In Denmark ICD-10 classification is only used in the secondary health sector (hospitals) not in the primary health sector (general practitioners). Even though this study spans 12 years and includes all with an initial primary or secondary ICD-10 diagnosis of COPD - and the majority of known COPD patients are believed to be included over time - there is a risk of underestimation. COPD patients that are only followed in the primary health care sector during the study period are not included and this will bias the results as these patients will tend to be less sick. This fact will tend to overestimate the direct and indirect costs of COPD.

The accuracy of the diagnosis and management is sensitive to the diagnostic criteria used by the reporting doctors. The people aged below 30-40 years with a diagnosis of COPD may – at least to some extent - be due to misclassification.

Furthermore, although J44 by far is the most common diagnosis used in COPD, several different

1  
2  
3  
4  
5  
6  
7  
8 diagnoses deriving from J40 (bronchitis), J41 (simple and mucopurulent chronic bronchitis), J43  
9 (emphysema) and J47 bronchiectasis) are also used to some (unknown) extent. We have chosen to  
10 exclude these diagnoses as well as J44.8 Other specified chronic obstructive pulmonary disease. It  
11 could be argued that a large proportion of these excluded individuals are very likely to have COPD,  
12 but because this is an epidemiologic study, entirely based on registry data, we decided to include  
13 only those with a specific diagnosis of COPD.  
14

15  
16 By allowing both primary and secondary diagnosis of COPD some correction of this problem has  
17 taken place but may have opened up for adding further comorbidity.  
18

19 In the control group there will be a number of undiagnosed patients with COPD (approx. 10%) thus  
20 introducing a bias tending to reduce the difference in costs between the two groups in our study  
21 (25).  
22  
23  
24

25 **Conclusion:** This study provides unique data at a national level regarding direct and indirect costs  
26 before and after initially diagnosed COPD as well as serious mortality, health and economic  
27 consequences for the individual patient and for society.  
28

29 As the economic consequences are present years prior to the first primary or secondary diagnosis of  
30 COPD in the secondary health sector one, it could be speculated that early identification and  
31 intervention might be part of the solution.  
32

33 Adequate treatment may reduce the consequences of COPD but, if socially and economically  
34 significant reductions in morbidity, mortality and social impact are to be achieved, much earlier  
35 disease identification and management are needed More research and evaluation of case finding  
36 strategies and disease management programs are needed (26).  
37  
38  
39  
40  
41  
42  
43  
44  
45  
46  
47  
48  
49  
50  
51  
52  
53  
54  
55  
56  
57  
58  
59  
60

## References

1. <http://www.who.int/en/> visited 18.04.2013.
2. Løkke A, Lange P, Scharling H, Fabricius P, Vestbo J. Developing COPD a 25 year follow up study of the general population. *Thorax* 2006; **61**: 935-39.
3. Decramer M, Janssens W, Miravittles M. Chronic obstructive pulmonary disease. *Lancet* 2012; **379**: 1341-51.
4. <http://www.goldcopd.org> visited 18.04.2013.
5. Murray CJ, Lopez AD. Alternative projections of mortality and disability by cause 1990-2020: Global Burden of Disease Study. *Lancet* 1997; **349**: 1498-1504.
6. Buist AS, Mcburnie MA, Vollmer WM et al. International variation in the prevalence of COPD (The BOLD Study): a population-based prevalence study. *Lancet* 2007; **370**: 741-50.
7. Lindberg A, Jonsson AC, Rönmark E, Lundgren R, Larsson LG, Lundbäck B. Prevalence of chronic obstructive pulmonary disease according to BTS, ERS, GOLD and ATS criteria in relation to doctors's diagnosis, symptoms, age, gender and smoking habits. *Respiration*. 2005; **72**: 471-9.
8. Menezes MB, Perez-Padilla R, Jardim JRB, Muino A, Lopez Mv, Valdivia G et al. Chronic obstructive pulmonary disease in five Latin American cities (the Platino study): a prevalence study. *Lancet* 2005; **366**: 1875-81.
9. Kim DS, Kim YS, Jung KS, Chang JH, Lim CM, Lee JH et al. Prevalence of chronic obstructive pulmonary disease in Korea: a population-based spirometry survey. *Am J Respir Crit Care Med*. 2005; **172**: 842-7.
10. Menezes AM, Victora CG, Rigatto M. Prevalence and risk factors for chronic bronchitis in Pelotas, RS, Brazil: a population-based study. *Thorax*. 1994; **49**: 1217-21.
11. Fukuchi Y, Nishimura M, Ichinose M, Adachi M, Nagai A, Kuriyama T, Takahashi K, Nishimura K, Ishioka S, Aizawa H, Zaher C. COPD in Japan: the Nippon COPD Epidemiology study. *Respirology*. 2004 Nov; **9** (4): 458-65.
12. Løkke A, Fabricius PG, Vestbo J, Marott JL, Lange P. Prevalence of chronic obstructive pulmonary disease in Copenhagen. Results from The Copenhagen City Heart Study. *Ugeskr Laeger*. 2007 Nov 12; **169** (46): 3956-60.
13. Detournay B, Pribil D, Fournier M, Housset B, Huchon G, Huas D, et al. The SCOPE Study: health-care consumption related to patients with chronic obstructive pulmonary disease in France. *Value Health*. 2004; **7**: 168-74.

Field Code Changed

- 1  
2  
3  
4  
5  
6  
7  
8 14. Dahl R, Lofdahl CG, editors. The economic impact of COPD in North America and Europe.  
9 Analysis of the confronting COPD survey. *Respir Med.* 2003; **97**(Suppl. C).  
10  
11 15. Wouters EFM. Economic analysis of the confronting COPD survey: an overview of the  
12 results. *Respir Med.* 2003; **97**(Suppl. C): S3–S14.  
13  
14 16. Grasso ME, Weller WE, Shaffer TJ, Diette GB, Anderson GF. Capitation, managed care and  
15 chronic obstructive pulmonary disease. *Am J Respir Crit Care Med.* 1998; **158**: 133–8.  
16  
17 17. Dal Negro RW, Tognella S, Tosatto R, Dionisi M, Turco P, Donner CF. Costs of chronic  
18 obstructive pulmonary disease (COPD) in Italy: The SIRIO study (Social Impact of  
19 Respiratory Integrated Outcomes). *Respir Med.* 2008; **102**: 92–101.  
20  
21 18. Menn P, Heinrich J, Huber RM, Jörres RA, John J et al. for the KORA Study Group. Direct  
22 medical costs of COPD - An excess cost approach based on two population-based studies.  
23 *Respir Med.* 2012; **106**: 540-8. Epub 2011 Nov 18.  
24  
25 19. Blanchette CM, Roberts MH, Petersen H, Dalal AA, Mapel DW. Economic burden of  
26 chronic bronchitis in the United States: a retrospective case-control study. *International*  
27 *Journal of COPD.* 2011; **6**: 73–81.  
28  
29 20. Bilde L, Rud SA, Dollerup J, Baekke BH, Lange P. The cost of treating patients with COPD  
30 in Denmark--a population study of COPD patients compared with non-COPD controls.  
31 *Respir Med.* 2007; **101**: 539-46. Epub 2006 Aug 4.  
32  
33 21. Lynge E, Sandegaard JL, Rebolj M. The Danish National patient Register (in Danish).  
34 *Scand J Public Health* 2011; **39**: 30-3.  
35  
36 22. Pedersen CB. The Danish Civil Registration System (in Danish). *Scand J Public Health*  
37 2011; **39**: 22-5.  
38  
39 23. Agresti A. Categorical Data Analysis. 2<sup>nd</sup> ed. New York: Wiley; 2002.  
40  
41 24. Efron B, Tibshirani RJ. An Introduction to the Bootstrap. London: Chapman & Hall, 1993.  
42 2008.  
43  
44 25. Shahab L, Jarvis MJ, Britton J, West R. Prevalence, diagnosis and relation to tobacco  
45 dependence of chronic obstructive pulmonary disease in a nationally representative  
46 population sample. *Thorax.* 2006; **61**:1043-7. Epub 2006 Oct 13.  
47  
48 26. Løkke A, Ulrik CS, Dahl R, Plauborg L, Dollerup J, Kristiansen LC, Cording PH,  
49 Dehlendorff C. Detection of previously undiagnosed cases of COPD in a high-risk  
50 population identified in general practice. *COPD.* 2012; **9**: 458-65. Epub 2012 May 29.  
51  
52  
53  
54  
55  
56  
57  
58  
59  
60

Field Code Changed



**Table 1:** Age, gender and education level distribution of COPD patients.

| Gender                  | N              | Percentage |
|-------------------------|----------------|------------|
| Male                    | 63,342         | 48.1       |
| Female                  | 68,469         | 51.9       |
| Married or co-habiting  |                | 54.0       |
| <b>Age distribution</b> |                |            |
| <14                     | -              | -          |
| 14-20                   | 136            | 0.1        |
| 20-29                   | 394            | 0.3        |
| 30-39                   | 1,717          | 1.3        |
| 40-49                   | 6,664          | 5.1        |
| 50-59                   | 19,601         | 14.9       |
| 60-69                   | 38,297         | 29.1       |
| 70-79                   | 51,524         | 39.1       |
| 80-92                   | 13,478         | 10.2       |
| ≥92                     | -              | -          |
| <b>Education level</b>  |                |            |
| Primary                 | 80,483         | 61.1       |
| Secondary               | 864            | 0.7        |
| Vocational              | 40,050         | 30.4       |
| Short college           | 1,824          | 1.4        |
| Medium college          | 6,784          | 5.1        |
| Master/PhD              | 1,806          | 1.4        |
| Total                   | <b>131,811</b> | 100.0      |

1  
2  
3  
4  
5  
6  
7  
8  
9  
10  
11  
12  
13  
14  
15  
16  
17  
18  
19  
20  
21  
22  
23  
24  
25  
26  
27  
28  
29  
30  
31  
32  
33  
34  
35  
36  
37  
38  
39  
40  
41  
42  
43  
44  
45  
46  
47  
48  
49  
50  
51  
52  
53  
54  
55  
56  
57  
58  
59  
60

**Figure 1:** Distribution of included (red) and excluded cases (blue) on the basis of diagnosis according to age (x-axis) and number (y-axis).

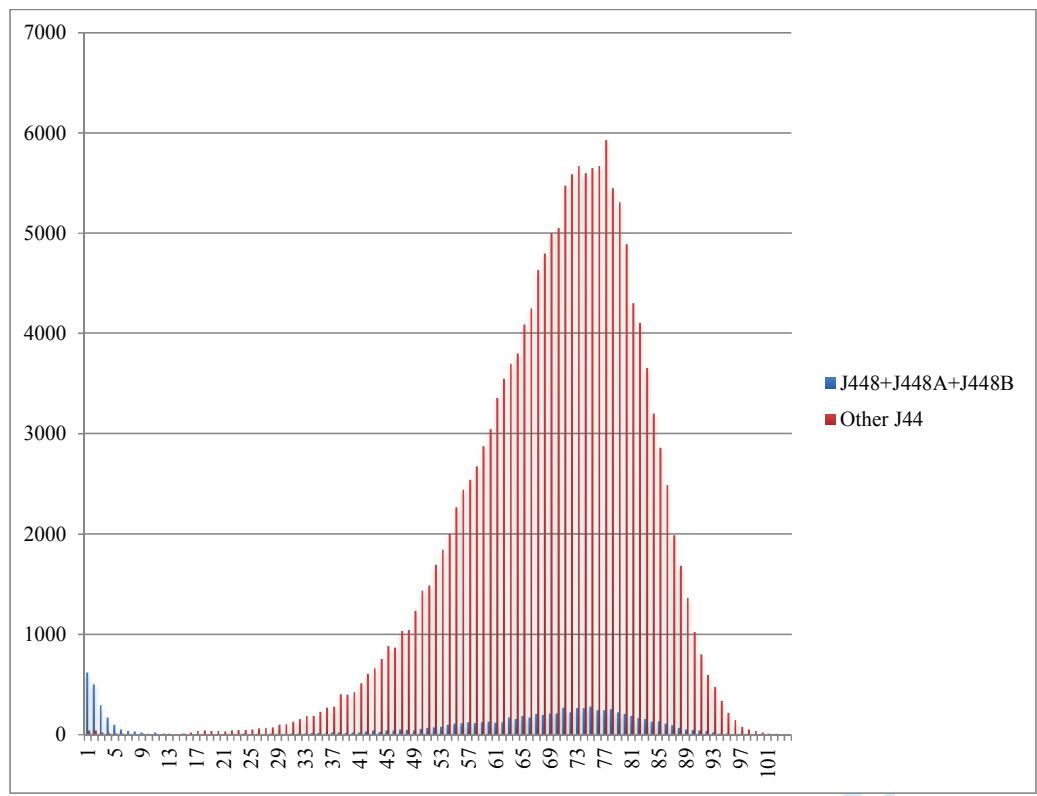

**Figure 2:** Kaplan-Maier survival distribution of COPD patients (blue) and controls (red) estimated using Cox proportional hazard model.

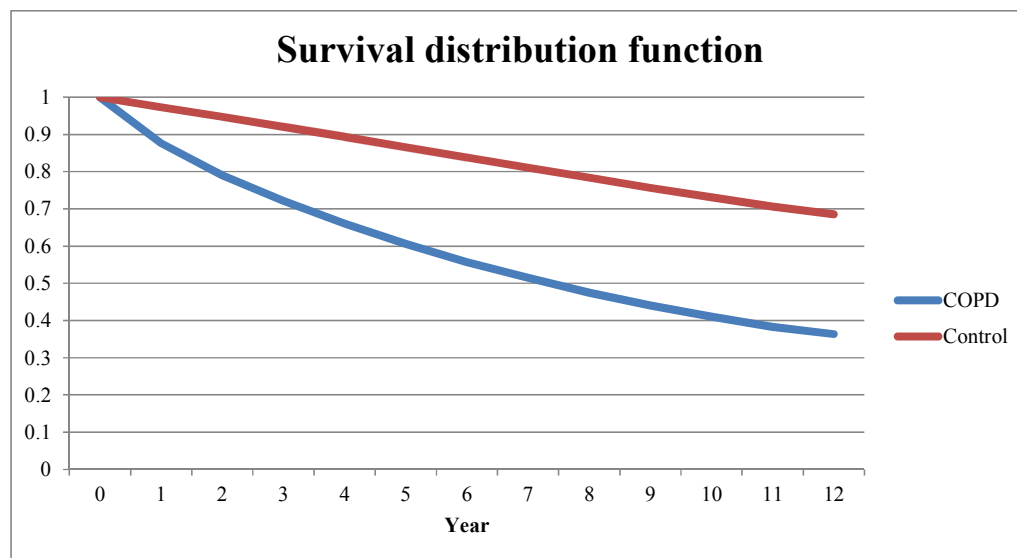

|                 |             | COPD                                    |                                   |                                   | Control                                 |                                   |                                   |
|-----------------|-------------|-----------------------------------------|-----------------------------------|-----------------------------------|-----------------------------------------|-----------------------------------|-----------------------------------|
| Survival        | Year        | Survival Distribution Function Estimate | SDF Upper 95.00% Confidence Limit | SDF Lower 95.00% Confidence Limit | Survival Distribution Function Estimate | SDF Upper 95.00% Confidence Limit | SDF Lower 95.00% Confidence Limit |
|                 | 0           | 1,000                                   | 1,000                             | 1,000                             | 1,000                                   | 1,000                             | 1,000                             |
|                 | 1           | 0,876                                   | 0,878                             | 0,875                             | 0,973                                   | 0,974                             | 0,972                             |
|                 | 2           | 0,790                                   | 0,792                             | 0,788                             | 0,948                                   | 0,949                             | 0,946                             |
|                 | 3           | 0,722                                   | 0,725                             | 0,720                             | 0,921                                   | 0,922                             | 0,919                             |
|                 | 4           | 0,661                                   | 0,664                             | 0,659                             | 0,894                                   | 0,895                             | 0,892                             |
|                 | 5           | 0,606                                   | 0,609                             | 0,603                             | 0,866                                   | 0,867                             | 0,864                             |
|                 | 6           | 0,557                                   | 0,560                             | 0,554                             | 0,838                                   | 0,840                             | 0,836                             |
|                 | 7           | 0,515                                   | 0,518                             | 0,512                             | 0,811                                   | 0,813                             | 0,808                             |
|                 | 8           | 0,475                                   | 0,478                             | 0,472                             | 0,784                                   | 0,786                             | 0,781                             |
|                 | 9           | 0,441                                   | 0,444                             | 0,437                             | 0,757                                   | 0,760                             | 0,754                             |
|                 | 10          | 0,410                                   | 0,414                             | 0,407                             | 0,731                                   | 0,734                             | 0,728                             |
|                 | 11          | 0,383                                   | 0,387                             | 0,379                             | 0,706                                   | 0,710                             | 0,703                             |
| 12              | 0,364       | 0,368                                   | 0,360                             | 0,686                             | 0,690                                   | 0,682                             |                                   |
| Censored        | N           | 131,811                                 |                                   |                                   | 131,811                                 |                                   |                                   |
|                 | % censored  | 53.5                                    |                                   |                                   | 80.2                                    |                                   |                                   |
| Hazard function | HazardRatio | 0,33                                    |                                   |                                   |                                         |                                   |                                   |
|                 | ProbChiSq   | 0,00                                    |                                   |                                   |                                         |                                   |                                   |
|                 | StdErr      | 0,01                                    |                                   |                                   |                                         |                                   |                                   |
|                 |             |                                         |                                   |                                   |                                         |                                   |                                   |

**Table 2:** Percentages of COPD patients and controls that receive income and various health care services (after diagnosis).

|                                     |   | COPD | Controls | P-value |
|-------------------------------------|---|------|----------|---------|
| <b>Outpatient treatment</b>         | % | 64.9 | 36.2     | <0.01   |
| <b>Inpatient treatment</b>          | % | 53.8 | 18.8     | <0.01   |
| <b>Medication</b>                   | % | 98.1 | 85.9     | <0.01   |
| <b>Public health insurance</b>      | % | 99.0 | 95.6     | <0.01   |
| <b>Income from employment</b>       | % | 16.7 | 23.8     | <0.01   |
| <b>Public transfer income total</b> | % | 90.3 | 83.8     | <0.01   |
| <i>Pension</i>                      | % | 60.3 | 63.8     | <0.01   |
| <i>Other public transfers</i>       | % | 27.6 | 18.6     | <0.01   |
| <i>Sickpay (publicly funded)</i>    | % | 5.5  | 3.6      | <0.01   |

(Bootstrapped Cochran-Armitage test showing whether the fraction received is significant for each expense type). The values given are in percentages.

**Table 3:** Health costs and income of COPD patients before and after diagnosis compared with controls.

|                  |                                   |   | COPD          | Controls     | P-value |
|------------------|-----------------------------------|---|---------------|--------------|---------|
| Before diagnosis | N                                 |   | 708,329       | 708,343      |         |
|                  | Outpatient treatment              | € | 335           | 227          | <0.01   |
|                  | Inpatient treatment               | € | 1,534         | 904          | <0.01   |
|                  | Medication                        | € | 918           | 434          | <0.01   |
|                  | Public health insurance           | € | 357           | 278          | <0.01   |
|                  | Income from employment            | € | 7,947         | 11,418       | <0.01   |
|                  | Public transfer income total      | € | 12,858        | 11,167       |         |
|                  | Pension                           | € | 7,029         | 6,824        | <0.01   |
|                  | Other public transfers            | € | 5,450         | 4,104        | <0.01   |
|                  | Sickpay (public funded)           | € | 378           | 238          | <0.01   |
|                  | Direct health costs               | € | 3,144         | 1,843        |         |
|                  | Indirect costs, foregone earnings | € | 3,471         |              |         |
|                  | Sum of direct and indirect costs  | € | <b>6,616</b>  | <b>1,843</b> |         |
|                  | Net costs                         | € | 4,773         |              |         |
|                  | Social transfer payments          | € | 12,858        | 11,167       |         |
|                  | Net costs including transfers     | € | <b>6,464</b>  |              |         |
| After diagnosis  | N                                 | N | 597,235       | 776,674      |         |
|                  | Outpatient treatment              | € | 789           | 429          | <0.01   |
|                  | Inpatient treatment               | € | 5,563         | 1,736        | <0.01   |
|                  | Medication                        | € | 1,782         | 610          | <0.01   |
|                  | Public health insurance           | € | 515           | 361          | <0.01   |
|                  | Income from employment            | € | 4,509         | 6,800        | <0.01   |
|                  | Public transfer income total      | € | 13,888        | 13,122       |         |
|                  | Pension                           | € | 9,171         | 10,317       | <0.01   |
|                  | Other public transfers            | € | 4,361         | 2,634        | <0.01   |
|                  | Sickpay (publicly funded)         | € | 356           | 171          | <0.01   |
|                  | Direct health costs               | € | 8,650         | 3,135        |         |
|                  | Indirect costs, foregone earnings | € | 2,291         |              |         |
|                  | Sum of direct and indirect costs  | € | <b>10,941</b> | <b>3,135</b> |         |
|                  | Net costs                         | € | 7,806         |              |         |
|                  | Social transfer payments          | € | 13,888        | 13,122       |         |
|                  | Net costs including transfers     | € | <b>8,572</b>  |              |         |

(Yearly costs calculated as the average costs with respect to income per year. N = summarized number of individuals × years observed. P-value from bootstrapped t-test. The values given are in Euros).

1  
2  
3  
4  
5  
6  
7  
8  
9  
10  
11  
12  
13  
14  
15  
16  
17  
18  
19  
20  
21  
22  
23  
24  
25  
26  
27  
28  
29  
30  
31  
32  
33  
34  
35  
36  
37  
38  
39  
40  
41  
42  
43  
44  
45  
46  
47  
48  
49  
50  
51  
52  
53  
54  
55  
56  
57  
58  
59  
60

**Figure 3:** Total health expenses, income from employment and public transfer income in Euros before and after diagnosis of COPD (green) compared with control subjects (blue).

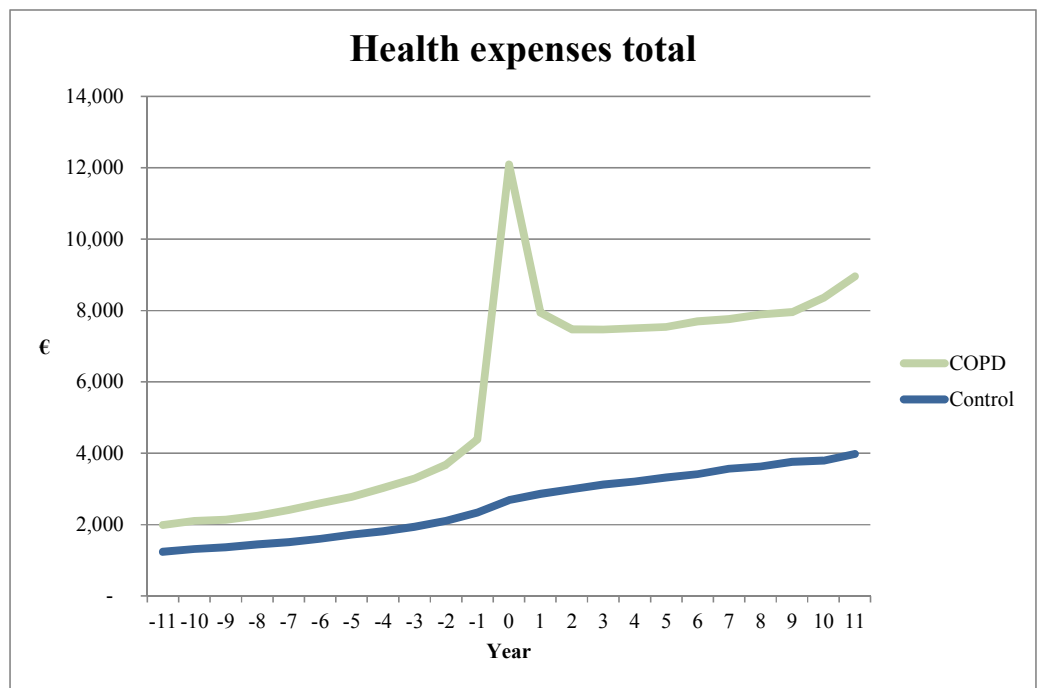

1  
2  
3  
4  
5  
6  
7  
8  
9  
10  
11  
12  
13  
14  
15  
16  
17  
18  
19  
20  
21  
22  
23  
24  
25  
26  
27  
28  
29  
30  
31  
32  
33  
34  
35  
36  
37  
38  
39  
40  
41  
42  
43  
44  
45  
46  
47  
48  
49  
50  
51  
52  
53  
54  
55  
56  
57  
58  
59  
60

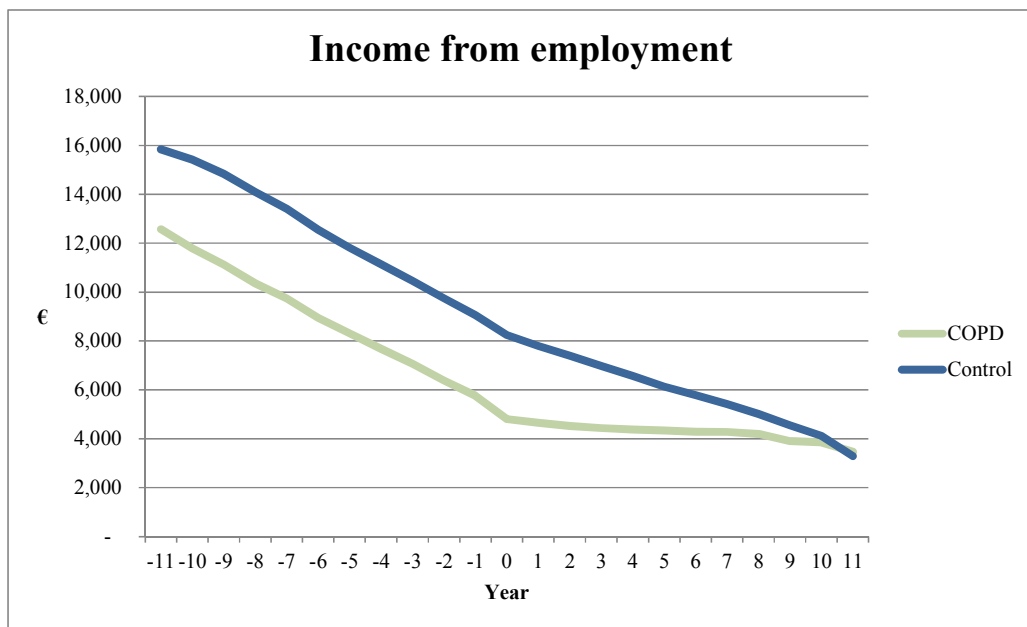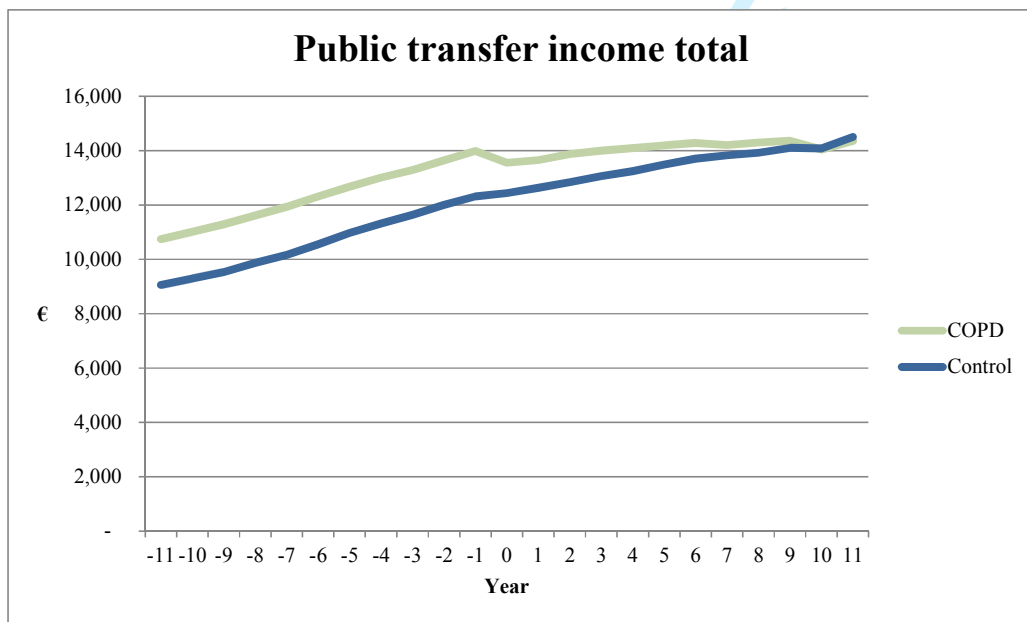

STROBE Statement—Checklist of items that should be included in reports of *cohort studies*

|                              | Item No | Recommendation                                                                                                                                                                                                                                                                                                                                                                                                |
|------------------------------|---------|---------------------------------------------------------------------------------------------------------------------------------------------------------------------------------------------------------------------------------------------------------------------------------------------------------------------------------------------------------------------------------------------------------------|
| <b>Title and abstract</b>    | 1       | (a) Indicate the study's design with a commonly used term in the title or the abstract<br>(b) Provide in the abstract an informative and balanced summary of what was done and what was found                                                                                                                                                                                                                 |
| <b>Introduction</b>          |         |                                                                                                                                                                                                                                                                                                                                                                                                               |
| Background/rationale         | 2       | Explain the scientific background and rationale for the investigation being reported                                                                                                                                                                                                                                                                                                                          |
| Objectives                   | 3       | State specific objectives, including any prespecified hypotheses                                                                                                                                                                                                                                                                                                                                              |
| <b>Methods</b>               |         |                                                                                                                                                                                                                                                                                                                                                                                                               |
| Study design                 | 4       | Present key elements of study design early in the paper                                                                                                                                                                                                                                                                                                                                                       |
| Setting                      | 5       | Describe the setting, locations, and relevant dates, including periods of recruitment, exposure, follow-up, and data collection                                                                                                                                                                                                                                                                               |
| Participants                 | 6       | (a) Give the eligibility criteria, and the sources and methods of selection of participants. Describe methods of follow-up<br>(b) For matched studies, give matching criteria and number of exposed and unexposed                                                                                                                                                                                             |
| Variables                    | 7       | Clearly define all outcomes, exposures, predictors, potential confounders, and effect modifiers. Give diagnostic criteria, if applicable                                                                                                                                                                                                                                                                      |
| Data sources/<br>measurement | 8*      | For each variable of interest, give sources of data and details of methods of assessment (measurement). Describe comparability of assessment methods if there is more than one group                                                                                                                                                                                                                          |
| Bias                         | 9       | Describe any efforts to address potential sources of bias                                                                                                                                                                                                                                                                                                                                                     |
| Study size                   | 10      | Explain how the study size was arrived at                                                                                                                                                                                                                                                                                                                                                                     |
| Quantitative variables       | 11      | Explain how quantitative variables were handled in the analyses. If applicable, describe which groupings were chosen and why                                                                                                                                                                                                                                                                                  |
| Statistical methods          | 12      | (a) Describe all statistical methods, including those used to control for confounding<br>(b) Describe any methods used to examine subgroups and interactions<br>(c) Explain how missing data were addressed<br>(d) If applicable, explain how loss to follow-up was addressed<br>(e) Describe any sensitivity analyses                                                                                        |
| <b>Results</b>               |         |                                                                                                                                                                                                                                                                                                                                                                                                               |
| Participants                 | 13*     | (a) Report numbers of individuals at each stage of study—eg numbers potentially eligible, examined for eligibility, confirmed eligible, included in the study, completing follow-up, and analysed<br>(b) Give reasons for non-participation at each stage<br>(c) Consider use of a flow diagram                                                                                                               |
| Descriptive data             | 14*     | (a) Give characteristics of study participants (eg demographic, clinical, social) and information on exposures and potential confounders<br>(b) Indicate number of participants with missing data for each variable of interest<br>(c) Summarise follow-up time (eg, average and total amount)                                                                                                                |
| Outcome data                 | 15*     | Report numbers of outcome events or summary measures over time                                                                                                                                                                                                                                                                                                                                                |
| Main results                 | 16      | (a) Give unadjusted estimates and, if applicable, confounder-adjusted estimates and their precision (eg, 95% confidence interval). Make clear which confounders were adjusted for and why they were included<br>(b) Report category boundaries when continuous variables were categorized<br>(c) If relevant, consider translating estimates of relative risk into absolute risk for a meaningful time period |



|                          |    |                                                                                                                                                                            |
|--------------------------|----|----------------------------------------------------------------------------------------------------------------------------------------------------------------------------|
| Other analyses           | 17 | Report other analyses done—eg analyses of subgroups and interactions, and sensitivity analyses                                                                             |
| <b>Discussion</b>        |    |                                                                                                                                                                            |
| Key results              | 18 | Summarise key results with reference to study objectives                                                                                                                   |
| Limitations              | 19 | Discuss limitations of the study, taking into account sources of potential bias or imprecision. Discuss both direction and magnitude of any potential bias                 |
| Interpretation           | 20 | Give a cautious overall interpretation of results considering objectives, limitations, multiplicity of analyses, results from similar studies, and other relevant evidence |
| Generalisability         | 21 | Discuss the generalisability (external validity) of the study results                                                                                                      |
| <b>Other information</b> |    |                                                                                                                                                                            |
| Funding                  | 22 | Give the source of funding and the role of the funders for the present study and, if applicable, for the original study on which the present article is based              |

\*Give information separately for exposed and unexposed groups.

**Note:** An Explanation and Elaboration article discusses each checklist item and gives methodological background and published examples of transparent reporting. The STROBE checklist is best used in conjunction with this article (freely available on the Web sites of PLoS Medicine at <http://www.plosmedicine.org/>, Annals of Internal Medicine at <http://www.annals.org/>, and Epidemiology at <http://www.epidem.com/>). Information on the STROBE Initiative is available at <http://www.strobe-statement.org>.
